10  
11  
12  
13  
14  
15  
16  
17  
18  
19  
20  
21  
22  
23  
24  
25  
26  
27  
28  
29

## Abstract

**Significance:** Diffuse optical tomography (DOT) uses near-infrared light spectroscopy (NIRS) to measure changes in cerebral hemoglobin concentration. Anatomical interpretations of NIRS data requires accurate descriptions of the cranio-cerebral relations and DOT sensitivity to the underlying cortical structures. Such information is limited for pediatric populations because they undergo rapid head and brain development. **Aim:** The present study aimed to investigate age-related differences in scalp-to-cortex distance and mapping between scalp locations and cortical regions of interest (ROIs) among infants (2 weeks to 24 months with narrow age bins), children (4 and 12 years) and adults (20 to 24 years). **Approach:** We used spatial scalp projection and photon propagation simulation methods with age-matched realistic head models based on MRIs. **Results:** There were age-group differences in the scalp-to-cortex distances in infancy. The developmental increase was magnified in children and adults. There were systematic age-related differences in the probabilistic mappings between scalp locations and cortical ROIs. **Conclusions:** Our findings have important implications in the design of sensor placement and making anatomical interpretations in NIRS and fNIRS research. Age-appropriate realistic head models should be used to provide anatomical guidance for standalone DOT data in infants.

### Keywords:

Diffuse optical tomography, near-infrared light spectroscopy, Monte Carlo simulation, infant, development, head models

30

## Introduction

31

Diffuse optical tomography (DOT) uses near-infrared light spectroscopy (NIRS) to

32

measure changes in cerebral hemoglobin concentration (Huppert, Franceschini, & Boas, 2009).

33

DOT does not provide anatomical information about the location of the hemodynamic signal.

34

Spatial scalp projection can be implemented to interrogate the brain region(s) underlying the

35

scalp sensor (i.e. optodes) locations (Tsuzuki & Dan, 2014). An alternative approach is to

36

generate a forward model of DOT sensitivity using photon propagation simulations (Boas,

37

Culver, Stott, & Dunn, 2002). The forward model can then guide DOT image reconstruction to

38

recover the brain locations of hemoglobin concentration changes (Cooper et al., 2012; Culver,

39

Siegel, Stott, & Boas, 2003). There are considerable brain structural changes during infancy

40

through childhood and adulthood (Richards & Conte, 2020; Richards & Xie, 2015). Accurate

41

models of DOT sensitivity must account for age-related changes in the head (Brigadoi, Aljabar,

42

Kuklisova-Murgasova, Arridge, & Cooper, 2014). The present study examined age-related

43

changes in scalp-to-brain distance and the correspondence between scalp locations and

44

anatomical regions. We used age-appropriate, realistic head models with extensive coverage of

45

the infancy period (2 weeks through 2 years), two child ages (4, 12 years), and young adults (20

46

to 24 years).

47

### Scalp-to-Cortex Distances Measured by Scalp Projection Methods

48

The initial step to understanding the underlying cortical structures being measured with

49

NIRS is to measure the distance from the NIRS recording locations to the cortical surface. The

50

10-20, 10-10, and 10-5 systems provide a standardized and reproducible method for placing

51

electrodes based on cranial landmarks and are often used to identify NIRS optode recording

52

positions (Jurcak, Tsuzuki, & Dan, 2007). Spatial scalp projection uses an algorithm to project an

53 electrode location on the scalp down to a location on the cortical surface (Okamoto & Dan, 2005;  
54 Tsuzuki & Dan, 2014). Adult studies projected 10-20 (Okamoto et al., 2004) and 10-10  
55 electrodes (Koessler et al., 2009) to standard brain templates. Okamoto et al. (2004) found that  
56 the scalp-to-cortex distance was shallower in the frontal, temporal and occipital regions, but  
57 deeper in the parietal and along the intra-hemispherical fissure. Spatial scalp projection  
58 facilitates the understanding of the sampling depth required to measure the cortical activities  
59 using NIRS recording or DOT.

60 It is important to examine age-related changes in scalp-to-cortex distance. There is  
61 extensive brain morphological development from infancy to adolescence (Gilmore et al., 2011;  
62 Makropoulos et al., 2016; Richards & Conte, 2020; Richards & Xie, 2015). One change is the  
63 distance from the scalp to cortical landmarks (Heschl's gyrus, inferior frontal gyrus, frontal pole,  
64 occipital pole, parieto-occipital sulcus, and vertex). There are significant increases in scalp-to-  
65 cortex distances from newborn to age 12 (Beauchamp et al., 2011). Kabdebon et al. (2014)  
66 virtually placed 10-20 electrodes on individual MRIs from 3- to 17-week-old infants. The  
67 distance between the scalp electrode positions and the cortical surface decreased from the frontal  
68 to occipital locations. The pattern was not observed in adult head models (Okamoto et al., 2004).  
69 Studies adopting the scalp projection method indicate that the scalp-to-cortex distance is smaller  
70 in infants (Emberson, Crosswhite, Richards, & Aslin, 2017; Kabdebon et al., 2014) and children  
71 (Whiteman, Santosa, Chen, Perlman, & Huppert, 2017) than in adults (Okamoto et al., 2004).  
72 Existing infant studies sampled a single age, or a narrow age range. Hence, there is insufficient  
73 information about the differences across age on overall scalp-to-cortex distance or scalp-to-  
74 cortex distance by electrode positions.

75 **Scalp-location-to ROI Mapping Using Scalp Projection Methods**

76           The spatial scalp projection method can also be used to identify the correspondence  
77 between scalp electrode locations and the underlying anatomical regions of interest (ROIs). The  
78 electrode-location-to-ROI mapping can be established first by transforming the individual's own  
79 MRI and electrode locations to a canonical average MRI template which has an anatomical  
80 stereotaxic atlas. Scalp electrode locations can then be projected to the cortical surface to identify  
81 to the corresponding ROI(s). Adult studies have demonstrated that there was a relatively  
82 consistent correspondence between the 10-20 (Okamoto et al., 2004) and 10-10 (Koessler et al.,  
83 2009) electrode positions and the underlying macro-anatomical ROIs. A methodological  
84 challenge in the ROI mapping is the limited availability of subjects' own MRIs. Co-registration  
85 methods for standalone DOT data have been developed so that electrode positions on the  
86 subject's scalp can be transformed to the space of reference MRIs in a database (Fekete, Rubin,  
87 Carlson, & Mujica-Parodi, 2011; Tsuzuki et al., 2012). The co-registration methods result in  
88 similar results as using subjects' own MRIs (Tsuzuki et al., 2012; Tsuzuki & Dan, 2014).

89           Co-registering scalp electrode locations with reference MRIs is an effective method for  
90 identifying electrode-location-to-ROI correspondence in infants. One method is to project  
91 individuals' electrode locations to a template brain with ROI parcellations constructed from a  
92 representative infant or an average template based on infant MRIs. Kabdebon et al. (2014)  
93 transformed infants' (3 to 17 weeks) individual head models to a 7-week-old infant template and  
94 found stable correspondence between 10-20 electrode locations and underlying microanatomical  
95 ROIs. Electrodes O1, O2, T5 and T6 were projected to more inferior cortical regions than the  
96 cortical locations reported in Okamoto et al. (Okamoto et al., 2004). This study showed that age-  
97 related changes in the head and brain structures may lead to age-related variations in the  
98 correspondence between electrode positions and brain structures. Tsuzuki et al. (2017)

99 transformed macroanatomical landmarks identified in 14 3- to 22-month-olds' MRIs to a 12-  
100 month-old template (Matsui et al., 2014) in reference to virtual 10-10 electrode locations (Jurcak  
101 et al., 2007). They found inter-subject variations in the relative positions among the  
102 microanatomical landmarks. However, the differences were smaller than the region defined by  
103 the 10-10 electrodes. Hence, there may be relatively stable electrode-location-to-ROI  
104 correspondence across ages. One important limitation of these studies is the use of a single  
105 individual or single-age template as a reference for age ranges across which significant brain  
106 development occurs (e.g. 3 to 17 weeks; or 3 to 22 months).

107         The use of individual MRIs or age-appropriate MRI templates and stereotaxic atlases for  
108 standalone DOT data can reduce errors in co-registration and provide more accurate  
109 representations of electrode-location-to-ROI correspondence. Lloyd-Fox et al. (2014) co-  
110 registered channel locations (midway of between adjacent optode/electrode locations) on both  
111 the infants' (4.5- and 6-month-olds) own MRIs and the age-appropriate average templates from  
112 the Neurodevelopmental MRI Database (Richards, in prep; Richards, Sanchez, Phillips-Meek, &  
113 Xie, 2015; Sanchez, Richards, & Almlil, 2012a, 2012b). Anatomical stereotaxic atlases were  
114 constructed for individuals' own MRIs and age-appropriate average templates (Fillmore,  
115 Richards, Phillips-Meek, Cryer, & Stevens, 2015). The correspondence between channel  
116 locations and ROIs in individual MRIs were highly comparable with the correspondence  
117 identified in the age-appropriate average MRI templates. An alternative to co-registering with the  
118 subjects' own MRIs or average templates is to use an MRI from another infant with similar head  
119 size and age. A series of functional near-infrared spectroscopy (fNIRS) studies adopted Lloyd-  
120 Fox et al. (2014)'s co-registration method and positioned optode locations on close-head-size  
121 individual MRIs (Lloyd-Fox, Wu, Richards, Elwell, & Johnson, 2013) or both close MRIs and

122 age-appropriate average templates (Emberson, Cannon, Palmeri, Richards, & Aslin, 2016;  
123 Emberson et al., 2017; Emberson, Richards, & Aslin, 2015). Spatial scalp projection was used to  
124 establish probabilistic mappings between channel locations and atlas ROIs. The channels with a  
125 large probability of localizing to a target ROI were used for group-level analyses.

### 126 **The Use of DOT Sensitivity to Describe Scalp-Cortex Correspondence**

127         The use of spatial scalp projection for determining electrode-location-to-ROI  
128 correspondence is limited. It does not consider the interaction between near-infrared light and the  
129 optical properties of the biological tissues. Therefore, the approach is limited to spatially  
130 contiguous anatomical areas and cannot model directly the extent of the cortical regions being  
131 measured by NIRS recording nor the intensity of the signal generated by blood flow. An  
132 alternative to the spatial scalp projection is to use DOT sensitivity patterns to determine the  
133 correspondence between scalp recording locations and underlying cortical anatomy. DOT  
134 sensitivity represents the extent to which the DOT instrument can detect changes in brain  
135 activities in the region that it is sampling (Mansouri, L'Huillier, Kashou, & Humeau, 2010). It  
136 can be quantified as the fluence distribution at source location (“Direct DOT”) and the project of  
137 the fluence distribution at the source and the detector location (“Source-Detector Channel DOT”;  
138 Fu & Richards, under review).

139         The DOT sensitivity provides a measure of the scalp-location-to-ROI correspondence.  
140 The sensitivity distribution can be used to estimate the distance from scalp locations to the  
141 surface of cortical regions that are *measurable* with DOT and localize the ROIs that would be  
142 sampled with NIRS (Haeussinger et al., 2011). Studies have estimated DOT sensitivity in head  
143 models with atlas parcellations in infants (Bulgarelli et al., 2019; Bulgarelli et al., 2020; Perdue  
144 et al., 2019), children (Whiteman et al., 2017) and adults (Zimeo Morais, Balardin, & Sato,

145 2018). These studies computed the channel-ROI correspondence and generated look-up tables to  
146 show channel-ROI probabilities. Zimeo Morais et al. (2018) computed the specificity of each  
147 channel to the corresponding ROIs using the S-D Channel DOT measure. Such look-up tables  
148 facilitate the optimization of channel array design to maximize DOT sensitivity to user-specified  
149 ROIs (Brigadoi, Salvagnin, Fischetti, & Cooper, 2018; Zimeo Morais et al., 2018) and help to  
150 localize the possible ROIs that generated the fNIRS signals (Bulgarelli et al., 2019; Bulgarelli et  
151 al., 2020; Perdue et al., 2019).

## 152 **The Present Study**

153 The current study examined age-related variations in the scalp-cortex correspondence.  
154 Our primary contribution was to use existing methods for DOT sensitivity across the period of  
155 infancy (2 weeks through 24 months) with narrow age bands, and compare these to older  
156 children (4, 12 years) and adults (20-24 years). Spatial scalp projection was used to estimate the  
157 distances between scalp electrode and channel locations and the cortical surface. We projected  
158 the electrode location to atlas locations delineated on individual MRIs to identify the anatomical  
159 mapping between scalp and ROI locations. We computed the distance between scalp locations  
160 and the cortical locations with maximum fluence. We provided a look-up table to present the  
161 probabilistic mapping between scalp channel locations and the underlying anatomical ROIs.  
162 Accurate and age-specific descriptions of scalp-to-cortex distance and scalp-to-ROI mapping are  
163 the bases for designing developmentally sensitive channel placements for NIRS recordings. Our  
164 look-up tables also provide important references for researchers to make anatomical  
165 interpretations of NIRS results from their specific age groups.

166

167



168  
169  
170  
171  
172  
173  
174  
175  
176  
177  
178  
179  
180  
181  
182  
183  
184  
185

## Method

### Participants

The participants were 1058 typically developing participants ranging from 2 weeks to 24 years of age. The same sample was studied in Fu and Richards (under review). The MRIs were obtained from open-access databases and a local scanning facility. The sample consisted of 9 participants (4 females) from the Autism Brain Imaging Data Exchange (ABIDE; Di Martino et al., 2014), 280 (143 females) from the Baby Connectome Project (BCP; Howell et al., 2019), 177 (93 females) from the Early Brain Development Study (EBDS; Gilmore et al., 2010), 282 (106 females) from the Infant Brain Imaging Study (IBIS; e.g. Hazlett et al., 2017), 14 (5 females) from the Pediatric Imaging, Neurocognition, and Genetics Data Repository (PING; Jernigan et al., 2016), and 296 scans (141 females) from data collected at the McCausland Center of Brain Imaging (MCBI) or drawn from collaborative studies at other sites. Table 1 presents the number of MRIs for the open access databases, separately for age and gender. The sample ages were narrowest in the infancy period (2 weeks, 1-, 1.5-, 3-, or 6-month intervals from 2 weeks through 2 years) and included exemplar ages in children and adolescent ages (4, 12 years) and adult (20-24 years). All studies had institutional review board approval and informed consent for participants.

186 **Table 1.** Demographical information of study participants by age group, sex, and data source.  
187 *Note.* ABIDE=Autism Brain Imaging Data Exchange; BCP=Baby Connectome Project;  
188 EBDS=Early Brain Development Study; IBIS=Infant Brain Imaging Study; MCBI=McCausland  
189 Center for Brain Imaging; PING=Pediatric Imaging, Neurocognition, and Genetics Data  
190 Repository  
191

| Participant Information |                |                 | Data Source    |              |               |               |                                             |               |
|-------------------------|----------------|-----------------|----------------|--------------|---------------|---------------|---------------------------------------------|---------------|
| Age Group               | Total <i>N</i> | Female <i>N</i> | ABIDE <i>N</i> | BCP <i>N</i> | EBDS <i>N</i> | IBIS <i>N</i> | MCBI and<br>Collaboration<br>Sites <i>N</i> | PING <i>N</i> |
| 2 Weeks                 | 41             | 24              | 0              | 3            | 38            | 0             | 0                                           | 0             |
| 1 Month                 | 96             | 40              | 0              | 17           | 79            | 0             | 0                                           | 0             |
| 2 Months                | 68             | 40              | 0              | 8            | 60            | 0             | 0                                           | 0             |
| 3 Months                | 38             | 21              | 0              | 24           | 0             | 0             | 14                                          | 0             |
| 4.5 Months              | 54             | 29              | 0              | 41           | 0             | 0             | 13                                          | 0             |
| 6 Months                | 74             | 35              | 0              | 0            | 0             | 60            | 14                                          | 0             |
| 7.5 Months              | 61             | 17              | 0              | 0            | 0             | 49            | 12                                          | 0             |
| 9 Months                | 60             | 35              | 0              | 48           | 0             | 3             | 9                                           | 0             |
| 10.5 Months             | 42             | 21              | 0              | 40           | 0             | 0             | 2                                           | 0             |
| 12 Months               | 109            | 36              | 0              | 0            | 0             | 89            | 20                                          | 0             |
| 15 Months               | 78             | 41              | 0              | 63           | 0             | 8             | 7                                           | 0             |
| 18 Months               | 76             | 31              | 0              | 36           | 0             | 8             | 32                                          | 0             |
| 2 Years                 | 74             | 22              | 0              | 0            | 0             | 65            | 1                                           | 0             |
| 4 Years                 | 24             | 9               | 0              | 0            | 0             | 0             | 10                                          | 14            |
| 12 Years                | 37             | 14              | 9              | 0            | 0             | 0             | 28                                          | 0             |
| 20-24 Years             | 134            | 77              | 0              | 0            | 0             | 0             | 134                                         | 0             |

192

193 **MRI Sequences**

194           The present study utilized T1-weighted (T1W) and T2-weighted (T2W) scans from each  
195 collection site. Details of the MRI acquisition protocols have been described in literatures on the  
196 Neurodevelopmental MRI Database (Fillmore, Phillips-Meek, & Richards, 2015; Fillmore,  
197 Richards, et al., 2015; Richards, in prep; Richards, Sanchez, et al., 2015; Sanchez et al., 2012a,  
198 2012b). All MRIs were converted to NIFTI compressed format with 32-bit floating point  
199 resolution. Bias-field inhomogeneity correction (N4 algorithm) was performed on the extracted  
200 T1-weighted images (Avants et al., 2011; Tustison et al., 2010).

201 **MRI Preprocessing and Segmentation**

202           First, the brains were extracted from the whole-head MRI volume in a procedure adapted  
203 from the FSL VBM pipeline (Douaud et al., 2007). The T1W volume for each participant was  
204 registered to an age-appropriate average MRI template. The MRI templates came from the  
205 Neurodevelopmental MRI database (Richards, Sanchez, et al., 2015; Sanchez et al., 2012a,  
206 2012b). The brain from the average template was transformed into the participant MRI space and  
207 used a mask on the head volume. The extracted masked data was then used with the FSL brain  
208 extraction tool program (Jenkinson, Pechaud, & Smith, 2005; Smith et al., 2004). Each brain was  
209 visually inspected and manually modified if necessary. Second, each head MRI volume was  
210 segmented into 9 or 10 media types: gray matter (GM), white matter (WM), cerebrospinal fluid  
211 (CSF), non-myelinated axons (NMA), other brain matter, skin, skull, air, eyes, and other inside  
212 skull material. Details of the segmentation methods are presented in the Supplemental  
213 Information. The segmented regions were assembled into a single MRI volume we will refer to  
214 as the “segmented head MRI volume”. Figure 1A shows a 3D rendering of the T1W volume from  
215 a 3-month-old infant with a cutout revealing the segmented MRI volume. The realistic head

216 model represents the geometry of the head and allow us to differentiate optical properties of  
217 different tissue types.

### 218 **Mesh Generation**

219 A “finite element method” (FEM) tetrahedral mesh was constructed from the segmented  
220 head MRI volume. Figure 1B and 1C displayed meshes that were produced using the iso2mesh  
221 toolbox with CGAL 3.6 mesh program (“v2m” function, Fang & Boas, 2009b). Tetrahedral  
222 meshes accurately represent boundaries of complex three-dimensional volumetric tissues and  
223 increase the accuracy in modeling photon propagation in the complex mediums such as the head  
224 and brain (Yan, Tran, & Fang, 2019). The FEM volumetric meshes have nodes that represent the  
225 voxel locations for the tetrahedra, a 4-element matrix representing the corners of each  
226 tetrahedron, and a vector representing the media type from the segmented head MRI volume. A  
227 mesh was generated for each segmented head MRI volume. Figure 1B depicts an example of the  
228 dense meshes. The number of nodes, elements, and tetra volume were calculated for the infants  
229 (2 weeks through 2 years), children (4 and 12 years), and adults (Supplemental Figure 1). We  
230 will refer to this as the “segmented FEM mesh”. We used the mesh to locate points on the scalp  
231 that were closest to the electrode positions, and for the segmented FEM mesh for the MMC  
232 computer program.

233

234 A.

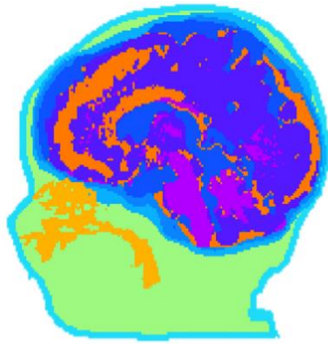

B.

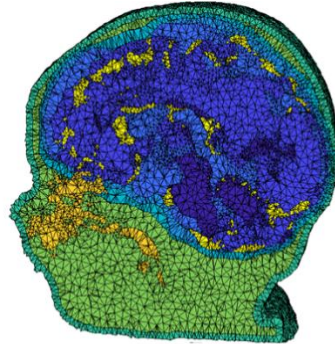

C.

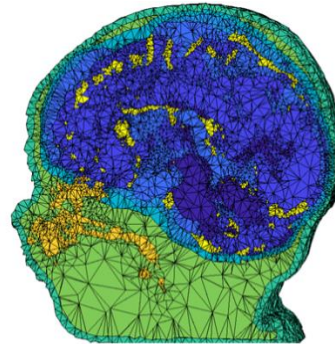

235

236 **Fig 1.** Segmented head MRI volumes. The examples were taken from the same 3-month-old  
237 infant MRI. A. The segmented head model. Aqua is the skull, purple is the gray matter, magenta  
238 is the white matter, dark orange is the cerebrospinal fluid, light blue is the dura, light orange is  
239 the nasal and mouth air cavities, and green is the non-bone structure (muscle, sinew, fat). B.  
240 the segmented head model with dense finite element model (FEM) mesh. C. The segmented head  
241 model with sparse FEM mesh.

242 **Scalp Locations**

243 ***Virtual Electrodes Placement***

244 The locations for the 10-10 and 10-5 electrode systems were constructed on each head  
245 MRI volume. Figure 2 illustrates the placements of 10-10 and 10-5 electrodes positions. First, we  
246 manually marked cranial fiducial points using MRICron (Rorden, 2012; Rorden & Brett, 2000):  
247 nasion (Nz), vertex (Vz), inion (Iz), left preauricular point (LPA), right preauricular point (RPA),  
248 left mastoid (LMa), and right mastoid (RMA) (Richards, Boswell, Stevens, & Vendemia, 2015).  
249 The coordinates of the fiducials were transferred on to the scalp mesh. Next, we calculated 81  
250 virtual electrode positions based on the “unambiguously illustrated 10-10 system (Jurcak et al.,  
251 2007). Details for constructing the 10-10 locations are described in Richards, Boswell, et al.  
252 (2015) and the Supplemental Information. We simulated a total of 358 electrodes on 10-5  
253 locations by calculating center points between 10-10 positions. The electrode positions also were  
254 computed for the average MRI templates.

255 ***Source-Detector Channels***

256 Source-detector channel locations were defined using electrode combinations centered on  
257 each 10-10 electrode. The 10-10 electrode locations were centered between surrounding adjacent  
258 pairs of 10-10 or 10-5 electrode locations. There were 251 source-detector pairs formed with  
259 adjacent 10-10 electrodes,  $Mean_{Separation} = 57.95$  mm;  $SD = 14.22$ , and 251 pairs formed with  
260 adjacent 10-5 electrodes,  $Mean_{Separation} = 28.92$  mm;  $SD = 7.06$ . The channel locations were used  
261 to estimate “S-D Channel DOT fluence” described below.

262

## Developmental Changes in Scalp-Cortex Correspondence 15

A.

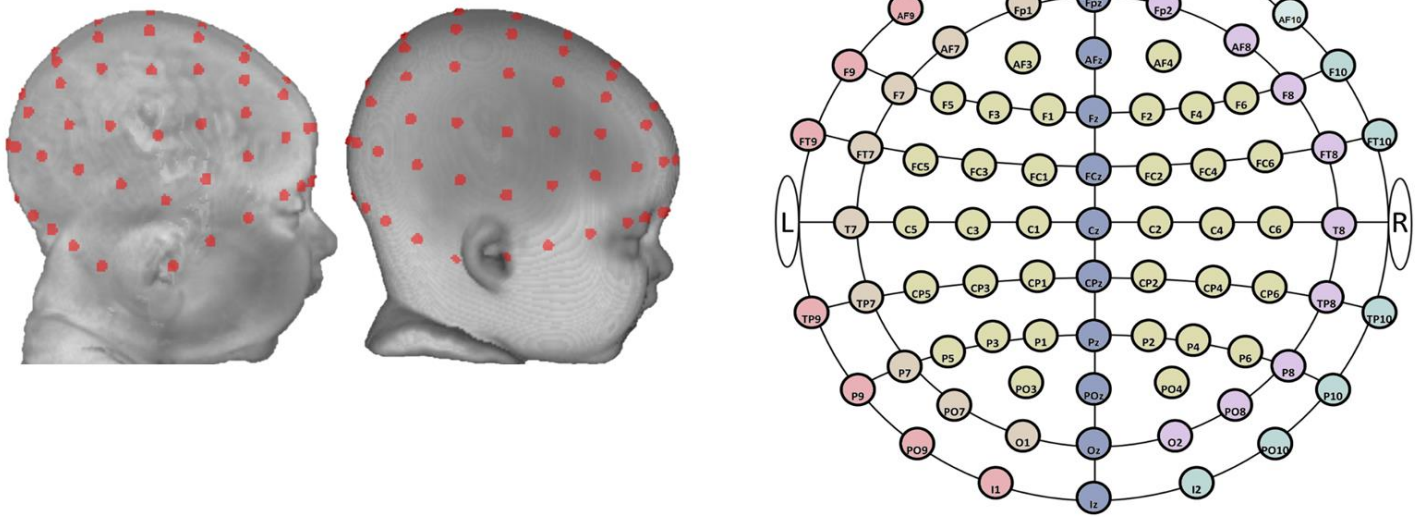

B.

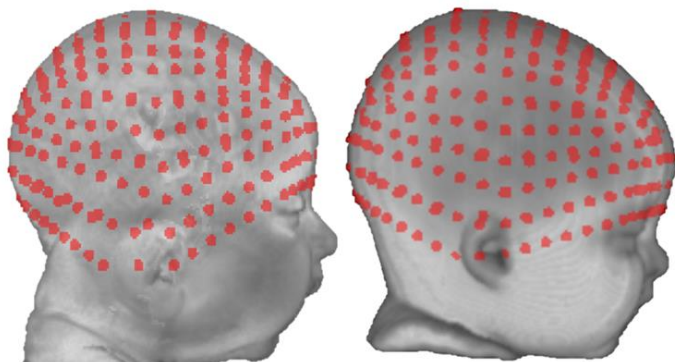

264 **Fig 2.** Virtual electrode placement. A. Ten-ten virtual electrode placement. From left to right: a  
265 three-month individual head model, an average template for three-month-olds, and a two-  
266 dimensional layout of the 10-10 system). Ten-ten electrodes were divided into six groups for  
267 visualization purposes. The six groups were color-coded on the two-dimensional schematic of  
268 the 10-10 system. Group 1: electrodes on the central curve (Nz-Cz-Iz). Group 2: electrodes on  
269 the left curve between Nz and Iz (N1-LPA/T9-I1). Group 3: electrodes on the right curve  
270 between Nz and Iz (N2-RPA/T10-I2). Group 4: electrodes on the left curve between Fpz and Oz  
271 (Fp1-T7-O1). Group 5: electrodes on the right curve between Fpz and Oz (Fp2-T8-O2). Group 6:  
272 the remaining electrodes enclosed by the central curve, the left and right curves between Fpz and  
273 Oz. B. Ten-five virtual electrode placement. From left to right: the same three-month individual  
274 head model and the three-month average template.



275 **Cortical Locations**

276 Three stereotaxic atlases were constructed for each individual MRI. The atlases delineate  
277 cortical lobes or more specified locations within the lobes. We created a 1.5 cm spherical mask  
278 around each electrode or channel location to standardize the region to be identified in the atlases.  
279 The atlases and spherical masks were used with the spatial scalp projection method (described  
280 below) to describe the correspondence between scalp electrode positions and corresponding  
281 cortical structures in the individual's own brain space with various spatial resolution (Lloyd-Fox  
282 et al., 2014). They were also used with the "S-D Channel DOT" estimates (described below) to  
283 identify the anatomical structures being sampled by the fluence distribution.

284 *Stereotaxic Atlases*

285 Three atlases were constructed for each individual MRI to delineate anatomical regions  
286 that can be used to identify brain locations corresponding to scalp electrode positions or DOT  
287 sensitivity patterns. Details of the atlas constructions may be found elsewhere (Fillmore,  
288 Richards, et al., 2015; Lloyd-Fox et al., 2014; Richards, 2013). The first atlas was the LONI  
289 Probabilistic Brain Atlas (LPBA40; Shattuck et al., 2008), which contains 56 areas from the  
290 cortical and subcortical regions, brainstem and cerebellum. The second was the Hammers atlas,  
291 based on MRIs from the IXI MRI database (Heckemann, Hajnal, Aljabar, Rueckert, & Hammers,  
292 2006), consists of 83 areas defined from the cortex, subcortical, brainstem and cerebellum  
293 (Gousias et al., 2008). We used a majority vote fusion procedure that combines labeled segments  
294 from manually segmented MRIs to produce atlases that identify an anatomical area for each  
295 brain voxel of the individual MRI. The third atlas was an automatically constructed lobar atlas  
296 that identifies the major cortical lobes (e.g. frontal), some sublobar cortical (e.g. fusiform gyrus),  
297 subcortical (e.g. striatum), cerebellum and brainstem. The atlas was constructed by extracting



298 and combining common areas from the LPBA40 and Hammers atlases, and manually segmented  
299 average template atlases transformed from the template space to the individual MRI space.

### 300 *Spherical Masks*

301 We created a sphere with 1.5 cm radius around each 10-10 electrode and channel  
302 location. Figure 3 shows examples of the spherical volumes were used as masks for determining  
303 the correspondence between scalp and brain locations. We identified the atlas regions of interest  
304 (ROIs) that intersected with the masks and computed the voxel numbers in the sphere of these  
305 ROIs. Hence, there was a distribution of atlas ROIs with various voxel numbers that were  
306 mapped to each electrode and channel location.

### 307 **DOT Sensitivity Analyses**

308 The DOT fluence distribution was estimated from Monte Carlo simulations using the  
309 Monte Carlo eXtreme package (MCX; Fang & Boas, 2009a; Fang & Yan, 2019). Details of the  
310 simulations are presented in Fu and Richards (under review) and the Supplemental Information.  
311 The output from the Monte Carlo simulation contained the fluence across the entire MRI volume  
312 separately for each electrode. Figure 3B shows the DOT fluence plotted on an individual subject  
313 MRI for a single electrode location. We computed “S-D Channel DOT fluence” by multiplying  
314 the source-electrode (optode) fluence distribution by the detector-electrode (optode) fluence  
315 distribution. This represents the DOT fluence sensitivity for a photon channel from the source to  
316 the detector (“PMDF” in Brigadoi & Cooper, 2015). Figure 3C shows the S-D Channel DOT  
317 fluence plotted on an MRI for a single source-detector pair.

318

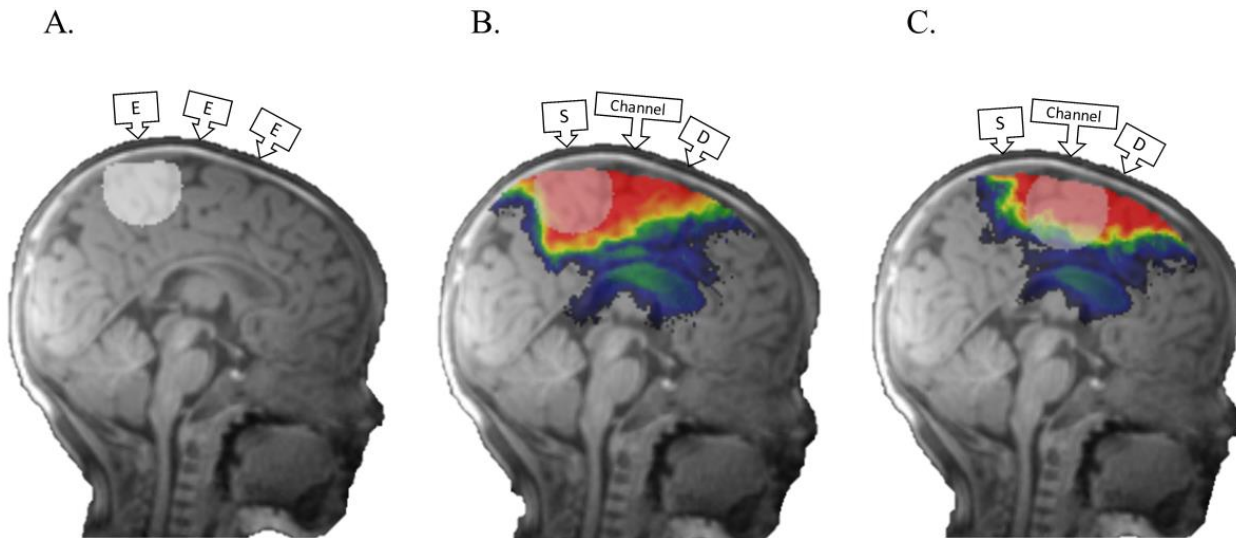

320 **Fig 3.** Methods for determining scalp-location-to-ROI mapping. The MRI was taken from a 3-  
321 month infant. A. An example of a 1.5cm-radius spherical mask created around an electrode  
322 location for the spatial scalp projection procedure. B. An illustration of a spherical mask created  
323 around a source location for the Direct DOT procedure. C. An illustration of a spherical mask  
324 created around a channel location for the Source-Detector (S-D) Channel DOT procedure. Monte  
325 Carlo photon migration simulations were used to estimate fluence distributions for individual 10-  
326 5 electrode locations (Direct DOT) and 10-10 channel locations (S-D Channel DOT). The red  
327 area represents greater fluence.

## 328 **Spatial Scalp Projection**

329           We performed spatial projections from each 10-10 or 10-5 electrode position on the scalp  
330 to the brain surface. These projections were used to measure the distance between each scalp  
331 electrode and the brain surface and to examine electrode scalp location to anatomical ROI  
332 correlation (Emberson, Cannon, et al., 2016; Emberson et al., 2017; Emberson et al., 2015;  
333 Lloyd-Fox et al., 2014; Lloyd-Fox et al., 2013). The brain locations underlying each electrode  
334 was determined by an algorithm in which a spatial projection from the electrode scalp surface to  
335 the brain center was done. The point where the projection intersected the cortex was identified.  
336 These projections were done with the scalp and brain elements of the segmented FEM mesh and  
337 mesh manipulation tools from the iso2mesh toolbox (Fang & Boas, 2009b).

## 338 **Scalp-to-cortex Distance**

339           We compared the distance from scalp electrode or channel locations to cortical surface  
340 across age groups. The “Scalp Projection” was simply the closest intersection of the brain from  
341 the projection of the electrode position toward the brain. The “Direct DOT” distance was based  
342 on the single-electrode DOT fluence. A 1.5 cm radius spherical mask was created at the point  
343 where the spatial projection intersected the brain. The maximum DOT fluence in the brain  
344 masked by the sphere was used as the location to calculate the Direct DOT distance. The “S-D  
345 Channel DOT” distance was based on the source-detector S-D Channel DOT fluence. The same  
346 spatial projection from the electrode, and the 1.5 cm sphere, was applied to the S-D Channel  
347 DOT fluence and the location of the maximum S-D Channel DOT fluence was used to calculate  
348 the S-D Channel DOT distance.

## 349 **Scalp-location-to-ROI Mapping**

350           The Scalp Projection, Direct DOT and the S-D Channel DOT sensitivity were used to  
351   generate a look-up procedure that links the scalp electrode or channel locations to the lobar,  
352   Hammer, and LPBA40 atlas ROIs. A 1.5 cm mask was placed on the scalp projection to the  
353   brain intersection, maximum point of the DOT fluence, or maximum point of the S-D Channel  
354   DOT fluence. Figure 3A shows a sphere surrounding the scalp projection to the brain  
355   intersection; Figure 3B shows a sphere surrounding the electrode to the max DOT fluence  
356   location; Figure 3C shows a sphere surrounding the electrode to the S-D Channel DOT fluence.  
357   The anatomical ROI of each voxel in the respective spheres were recorded. The percentage of  
358   voxels in each ROI that intersected with the spherical masks was computed. We created tables  
359   for each age that listed the ROIs and the percentage of voxels in each ROI that intersected with  
360   the spherical masks created around the 10-10 electrode (Scalp Projection) and channel locations  
361   (S-D Channel DOT). The Scalp Projection look-up table details the spatial correspondence  
362   between the scalp electrode location and anatomical brain regions. The S-D Channel DOT look-  
363   up table illustrates the channel DOT sensitivity to cortical regions.

#### 364   **Additional Measures and Analyses**

365           There were several methods and results that are presented in the Supplemental  
366   Information. These include tMCimg (Boas et al., 2002) simulations in all individual MRIs and  
367   age-appropriate average templates and MMC simulations (Fang & Yan, 2019; Tran, Yan, &  
368   Fang, 2020; Yan et al., 2019) in 3-month and 6-month old individual MRIs and average  
369   templates. We compared the scalp-to-cortex distance estimations obtained from the MCX,  
370   tMCimg, and MMC simulation packages. *fOLD Channels*: We used a set of electrode pairs to  
371   define source-detector channels from the 130 channel locations specified in the fNIRS Optodes'  
372   Location Decider (fOLD) (Zimeo Morais et al., 2018). We computed S-D Channel DOT fluence

373 in selected age groups (3 month, 6 month, and 20-24 years) for the 130 channel locations using  
374 fluence estimated from MCX simulations (Zimeo Morais et al., 2018). We provided a look-up  
375 table that presented the specificity of each fOLD channel to the underlying ROI(s). We also  
376 compared scalp-to-cortex distances among simulation methods and brain model types.

## 377 **Results**

### 378 **Scalp-to-Cortex Distance**

379 The scalp-to-cortex distances were analyzed as a function of age for the Scalp Projection  
380 and S-D Channel DOT estimation methods. A one-way ANOVA for the infant ages (2 weeks  
381 through 2 years) was computed separately for the distances from the three estimation methods.  
382 There were significant main effects of age on the Scalp Projection,  $F(12, 856) = 19.01, p < .001$ ,  
383 Direct DOT,  $F(12, 849) = 31.35, p < .001$ , and S-D Channel DOT distance measures,  $F(12,$   
384  $849) = 31.86, p < .001$ . Figure 4 shows the average scalp-to-cortex distances for the age groups  
385 for the three estimation methods. The differences in the distances for the infant ages did not  
386 show a systematic age-related change. The Scalp Projection and Direct DOT distances were  
387 similar, and the S-D Channel DOT distances were larger than the distances from the other  
388 methods. We also tested whether scalp-to-cortex distances changed significantly from infancy (2  
389 weeks to 2 years) to childhood (4 years and 12 years) and to adulthood (20-24 years). Results  
390 from the one-way ANOVAs confirmed the age group effect in distances estimated using scalp  
391 projection,  $F(2, 967) = 734.84, p < .001$ , Direct DOT,  $F(2, 1054) = 1708.43, p < .001$ , and S-D  
392 Channel DOT,  $F(2, 1054) = 1317.58, p < .001$  (c.f. Figure 7B). The distances increased from  
393 infancy and toddlerhood to childhood and from childhood to adulthood for all estimation  
394 methods, all  $p$ 's  $< .001$ . Figure 4 shows an obvious change from the infant to the child/adolescent  
395 and adult ages in scalp-to-cortex distance.



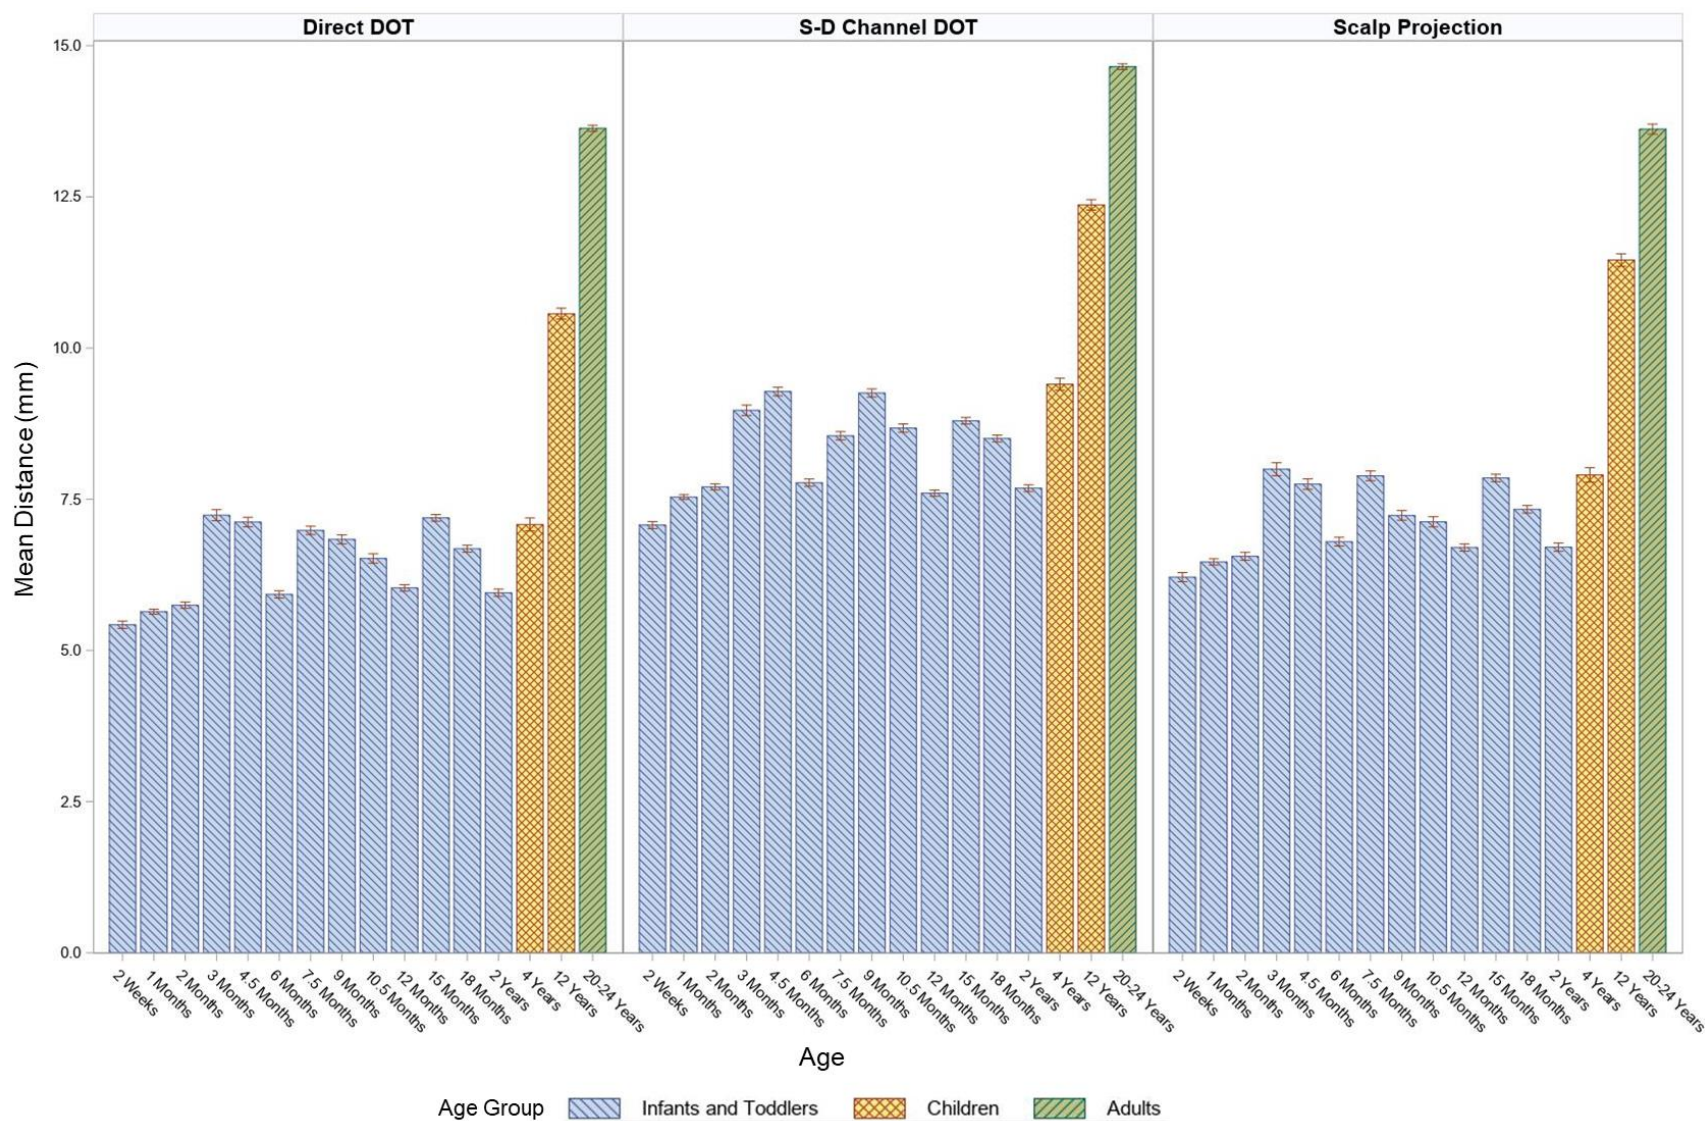

396  
 397 **Fig 4.** Mean scalp-to-cortex distances by age groups. The distances were estimated using scalp projection, Direct DOT and S-D  
 398 Channel DOT with individual MRIs

399 We examined age-related changes in scalp-to-cortex distance. Figure 5 shows 2-D scalp  
400 topographical maps plotted with the Scalp Projection distance represented by the color map  
401 separately by age, and 3-D renderings of the distance on the head for three selected ages. There  
402 was an increase in the distance across electrode positions from the infants to the children to the  
403 adults. The electrodes on the bottom row (N1, AF9, F9, FT9, T9/LPA, TP9, P9, PO9, 11, N2,  
404 AF10, F10, FT10, T10/RPA, TP10, P10, PO10, and 12) showed the largest scalp-to-cortex  
405 distance, followed by the frontal and midline electrode positions, then followed by electrodes  
406 over the temporal, parietal and occipital positions. The shift from the frontal-midline electrodes  
407 to the other scalp positions was evident in several groups. Two-way ANOVAs with scalp  
408 positions as a within-subjects factor and age group as a between-subjects factor was conducted to  
409 examine age differences in distances by scalp locations among infant, child and adult age groups.  
410 We divided the electrodes to three groups based on Figure 5. Group one contained electrodes in  
411 the bottom row and midline. Group two contained frontal electrodes ('F' electrodes), and group  
412 three contained the rest of the electrodes. Among infants, there was a significant effect of age,  $F$   
413  $(12, 2547) = 64.28, p < .001$ , electrode group  $F(2, 2547) = 6936.95, p < .001$ , and age-by-  
414 electrode-group interaction effect,  $F(24, 2547) = 12.64, p < .001$ . The scalp-to-cortex distances  
415 of the group one electrodes were greater than those of group two and three electrodes ( $p$ 's <  
416  $.001$ ). The group two electrodes at frontal locations were more distant to the cortex than group  
417 three electrodes at central, temporal, parietal, and occipital locations for most of the infant  
418 groups,  $p$ 's <  $.01$ , except for 15 months ( $p = .25$ ), 18 months ( $p = .23$ ), and 2 years ( $p = .15$ ).  
419 Among children, the main effect of age group,  $F(1, 177) = 260.89, p < .001$ , and electrode  
420 group,  $F(2, 177) = 406.58, p < .001$ , were significant. There was no age-by-electrode-group  
421 interaction effect,  $p = .022$ . The distance across all electrodes positions was greater in 12-year-

422 olds than 4-year-olds,  $p < .001$ . The distance was largest in group one electrodes,  $p$ 's  $< .001$ ,  
423 followed by group three electrodes,  $p = .025$ , across all child age groups. Among adults, the  
424 effect of electrode group was significant,  $F(2, 399) = 260.63$ ,  $p < .001$ . Group one electrodes  
425 had the furthest distances to the cortex,  $p$ 's  $< .001$ , followed by group three electrodes,  $p = .002$ .  
426



427

A.

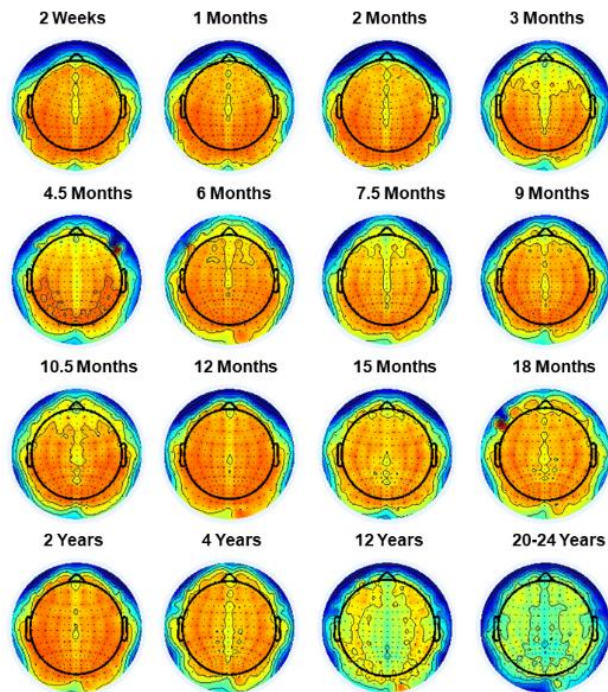

428

429

B.

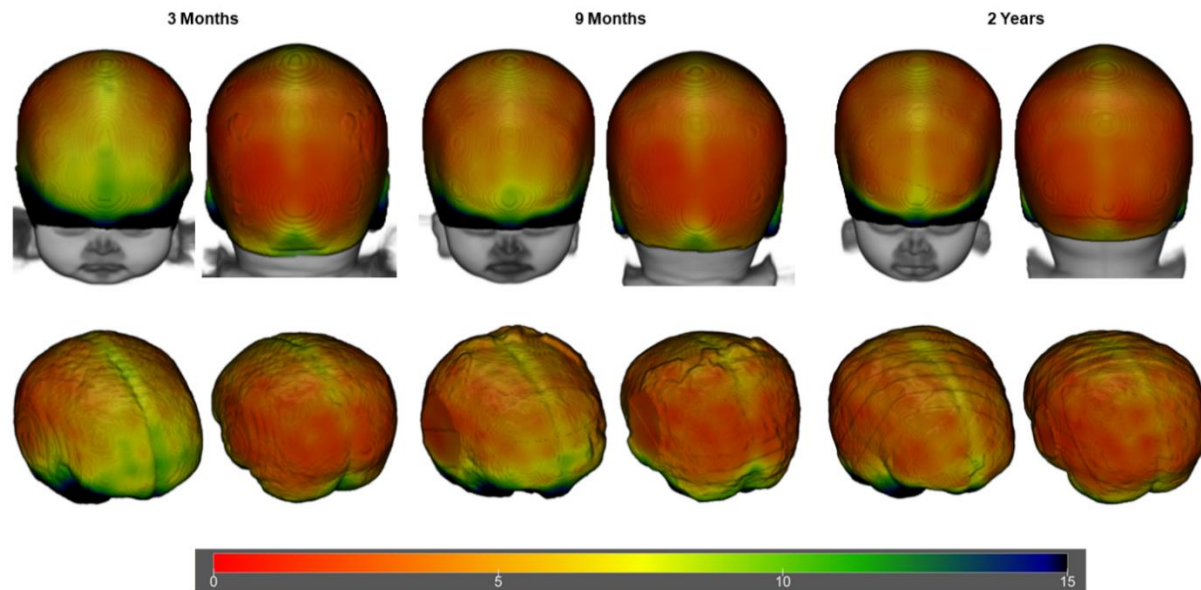

430

431

432

433

434

435

436

437

**Fig 5.** Mean distance from the scalp to cortical surface by electrode locations estimated using scalp projection. For the visualization purpose, estimations for the 10-5 electrode locations were displayed. The color bar denotes the distance range for all figure types. A. Scalp topographical maps for all age groups. Darker red represents closer scalp-to-cortex distances, and darker blue indicates greater distances. B. Three-dimensional rendering of mean distances on the heads (top row) and on the brains (bottom row) at 3-month, 9-months, and 2-years, selected as examples. Head and brain models were generated using age-matched average templates.

438 Figure 6 shows 2-D maps and 3-D renderings for the S-D Channel DOT scalp-to-cortex  
439 distance. The distance of the maximum S-D Channel DOT fluence was larger than the Scalp  
440 Projections distance at all ages (cf. Figure 5, 6). A similar pattern of distances across the scalp  
441 was found with the S-D Channel DOT distance. Among infants, there was a significant effect of  
442 age,  $F(12, 2547) = 66.27, p < .001$ , electrode group  $F(2, 2547) = 3635.67, p < .001$ , and age-by-  
443 electrode-group interaction effect on scalp-to-cortex distances,  $F(24, 2547) = 14.34, p < .001$ .  
444 The distances at group one electrode locations were the largest ( $p$ 's  $< .001$ ). The distances at  
445 group two electrode locations were greater than group three locations for most of the infant  
446 groups,  $p$ 's  $< .05$ , except for 2 weeks ( $p = .92$ ), 1 months ( $p = .49$ ), 2 months ( $p = .74$ ), and 18  
447 months ( $p = .23$ ). Among children, there was a significant effect of age  $F(1, 177) = 147.05, p <$   
448  $.001$ , and electrode group,  $F(2, 177) = 205.32, p < .001$ . The interaction effect was also  
449 significant,  $F(2, 177) = 3.67, p = .03$ . Group one electrodes had the furthest distances to the  
450 cortex for both 4- and 12-year-olds,  $p$ 's  $< .001$ . Distances at group two electrode locations were  
451 greater than group three locations for 12-year-olds,  $p = .02$ , but not for 4-year-olds,  $p = .29$ .  
452 Among adults, the effect of electrode group was significant,  $F(2, 399) = 280.34, p < .001$ . Group  
453 one electrodes had the furthest distances to the cortex,  $p$ 's  $< .001$ , followed by group three  
454 electrodes,  $p = .001$ . The findings indicate that the scalp-to-cortex distances were largest in  
455 bottom-row and midline electrodes for all age groups. The anterior-to-posterior decreases in  
456 scalp-to-cortex distance were visible in most of the infant groups.

457

Developmental Changes in Scalp-Cortex Correspondence 27

458

A.

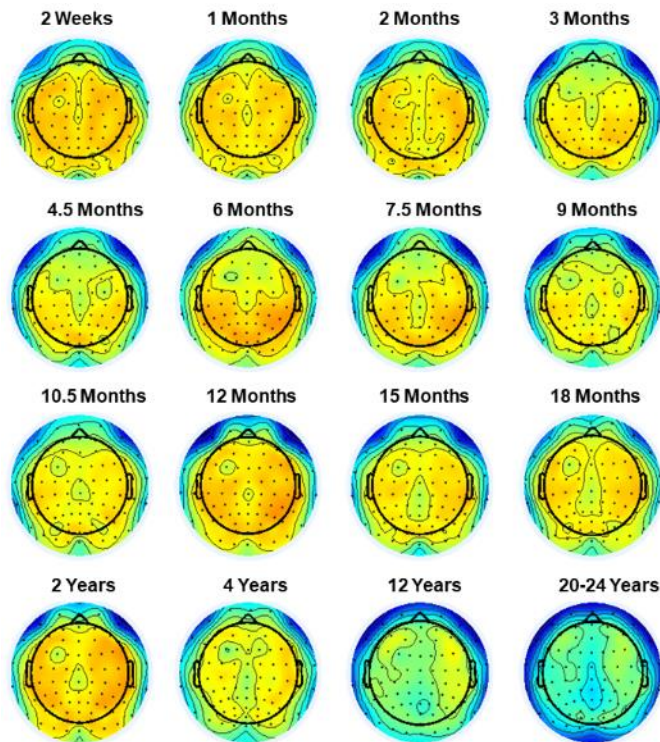

459

460

B.

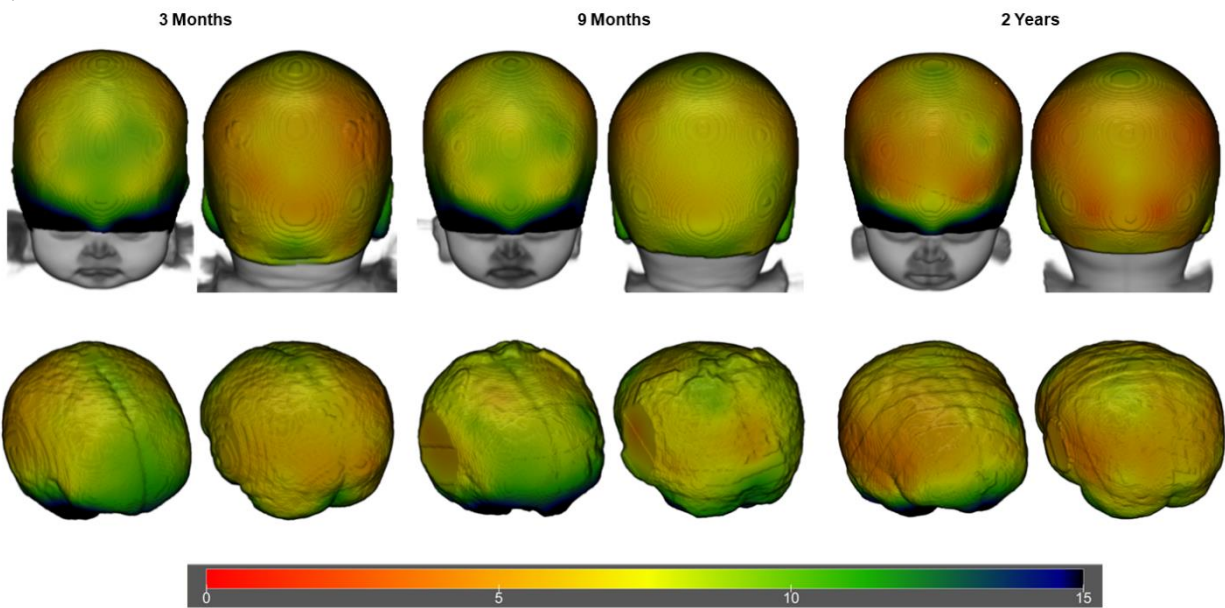

461

462

463

464

465

466

467

**Fig 6.** Mean S-D Channel DOT distances at 10-10 channel positions. The color bar denotes the distance range for all figure types. A. Scalp topographical maps for all age groups. Darker red represents closer scalp-to-cortex distances, and darker blue indicates greater distances. B. Three-dimensional rendering of mean distance on the heads (top row) and on the brains (bottom row) at 3-month, 9-months, and 12-years, selected as examples. Head and brain models were generated using age-matched average templates.

468           We inspected changes in the scalp-to-brain distances across the individual 10-10  
469 electrode positions. The distance measures were averaged across three age groups (infants and  
470 toddlers: 2 weeks to 2 years; children: 4 years and 12 years; and adults: 20-24 years), electrode  
471 position, and estimation methods (Scalp Projection, Direct DOT, and S-D Channel DOT). Figure  
472 7A shows the scalp-to-cortex distances for the 10-10 positions separately for the three age groups  
473 and the three estimation methods. Two-way ANOVAs were conducted to examine the effect of  
474 estimation method, electrode group (six groups based on Figure 7), and interact effect on mean  
475 distances among the infant, child, and adult age groups. The main effect of estimation method  
476 was significant for infants,  $F(2, 15500) = 1177.97, p < .001$ , children,  $F(2, 1068) = 60.72, p$   
477  $< .001$ , and adults,  $F(2, 1890) = 39.91, p < .001$ . The main effect of electrode group was also  
478 significant for infant,  $F(5, 15500) = 11697.60, p < .001$ , children,  $F(5, 1068) = 521.70, p < .001$ ,  
479 and adults,  $F(2, 1890) = 591.76, p < .001$ . The interaction effect between estimation method and  
480 electrode group was significant for infants,  $F(10, 15500) = 102.36, p < .001$ , children,  $F(10,$   
481  $1068) = 4.14, p < .001$ , and adults,  $F(10, 1890) = 2.08, p < .02$ . The larger distances were at  
482 bottom row electrode position for all estimation methods and age groups,  $p$ 's  $< .001$ . This was  
483 followed by the midline electrodes and then by the electrodes in the other positions for all  
484 estimation methods and age groups,  $p$ 's  $< .001$ . Figure 7B displays the mean S-D Channel DOT  
485 distances for the infant, child, and adult group averaged across the 81 channel positions and  
486 individual age groups. We also found that the distances for the S-D Channel DOT fluence for the  
487 participant-based averages (e.g., Figure 7A) were similar to the distances calculated from the  
488 average MRI template for the same age (Supplemental Information Figure 3A).

489           The scalp-to-cortex distances were examined also for the average MRI templates.  
490 Supplemental Figure 3 shows the S-D Channel DOT distance across age for the distances

491 calculated from the average MRI templates. The distances for the participant-based averages  
492 (e.g., Figure 4, Figure 7B) were similar to the distances calculated from the average MRI  
493 template (Supplemental Information Figure 3B).

494



495 A.

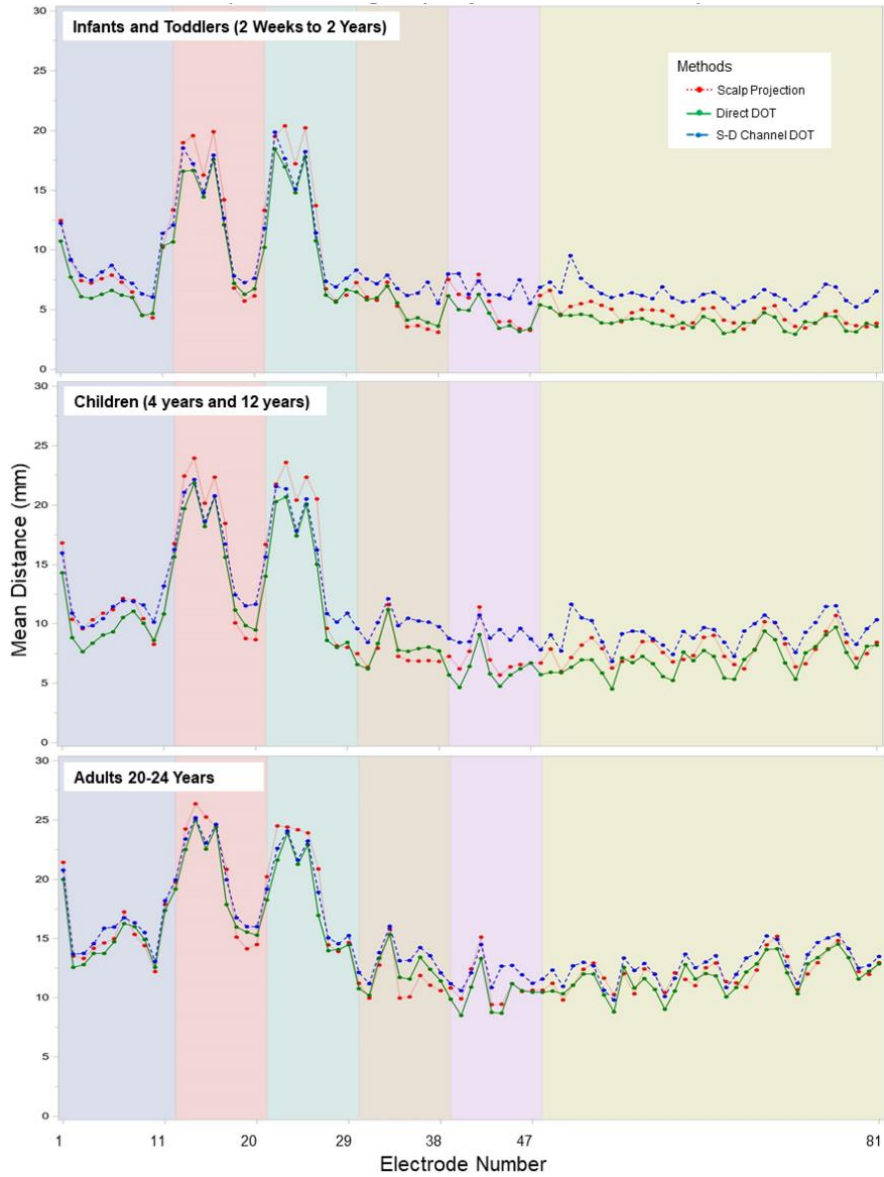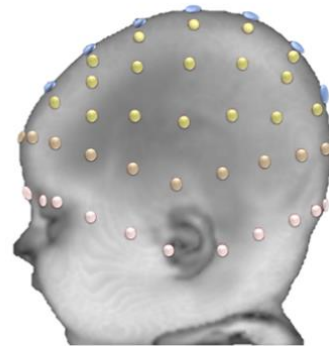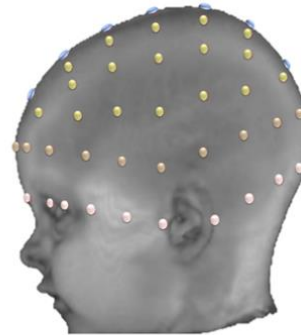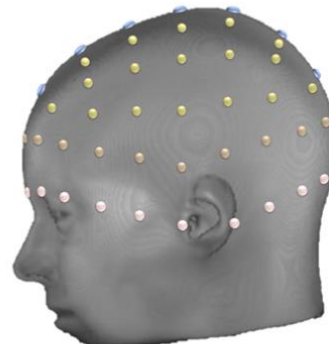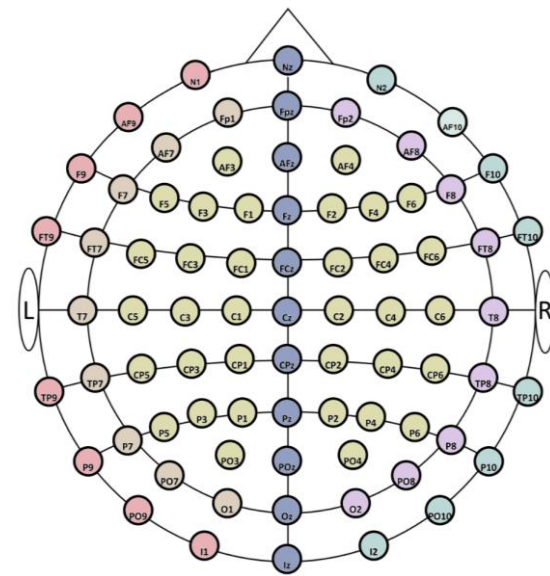

497

B.

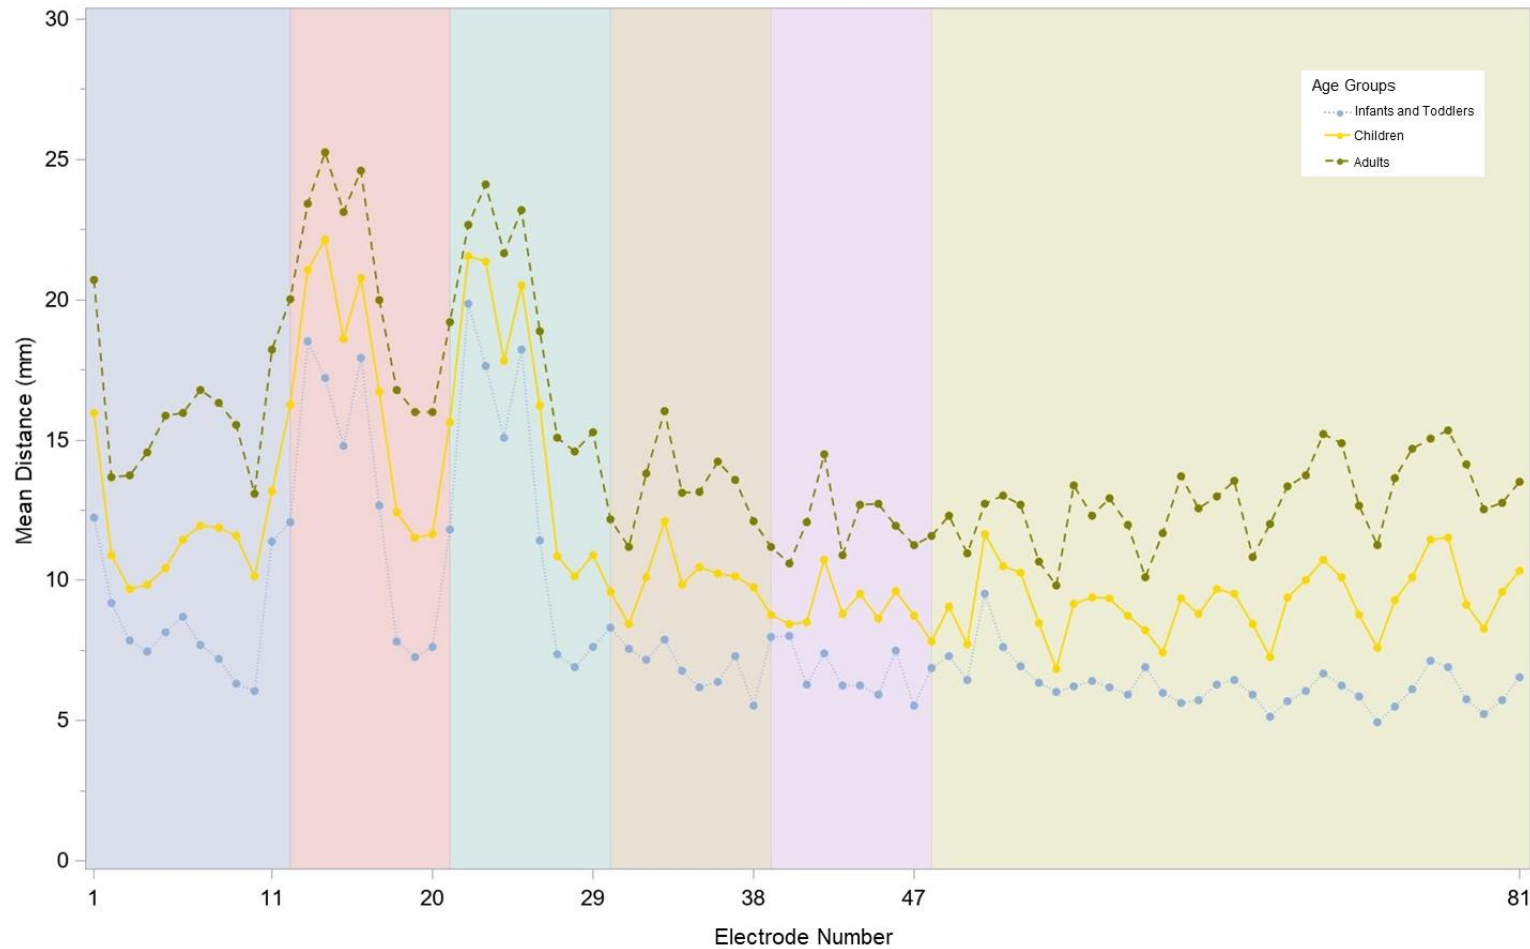

498

499 **Fig 7.** Mean scalp-to-cortex distances across 10-10 electrode and channel locations by age groups. A. Distances estimated using Scalp  
 500 Projection, Direct DOT and S-D Channel DOT with individual MRIs. Electrodes were divided into five groups. In addition, a two-  
 501 dimensional layout of the 10-10 system (top right), a three-dimensional rendering of the electrode locations on a 3-month-old infant  
 502 average template (top left), a 4-year-old child average template (middle) and a 20-24-year-old adult average template (bottom) were  
 503 displayed to aid visualization. The 10-10 electrode name and the number in the figure are in Table 3, and the five electrode groups are  
 504 listed in Figure 1. B. Mean S-D Channel DOT distances for infants and toddlers (2 weeks to 2 years), Children (4 years and 12 years)  
 505 and adults (20-24 years).

## 506 **Scalp-location-to-ROI Mapping**

507           The Scalp Projection and the S-D Channel DOT sensitivity were used to generate look-up  
508 tables that show the cortical ROIs for each of the 10-10 electrodes. An Excel spreadsheet is  
509 presented in the Supplementary Information with this information (Supplemental Information:  
510 Table1). This table has a tab for each estimation type and age combination (e.g., Spatial 2-0  
511 Weeks, Spatial 1-0Month, Source-Detector-DOT 2-0Weeks, Source-Detector-DOT 1-  
512 Month....). Each table has one row for each electrode containing columns for the electrode name  
513 and the cortical ROIs for the lobar, Hammers, and LPBA40 atlases. This table could be used to  
514 find a specific electrode-ROI combination for each of the ages in the study. We use the name  
515 “electrode” and “channel” interchangeably, though the “electrode location” properly refers to the  
516 Scalp Projection method where the “channel location” properly refers to the S-D Channel DOT  
517 method.

518           The Scalp Projection and S-D Channel DOT estimations yielded overlapping and  
519 considerably different scalp-location-to-ROI Mappings. For example, between-method  
520 discrepancy was found at 32 scalp locations where the electrode was mapped to at least one  
521 different ROI for the 3-month group. The discrepancy was found at 29 scalp locations for the 20-  
522 24-year-olds.

523           The channel-location-to-ROI correspondences showed stability over age for some of the  
524 electrode/atlas ROIs based on the S-D Channel DOT sensitivity estimation. The lobar atlas has  
525 macrostructural segmentations which resulted in similar channel-to-ROI correspondence across  
526 ages. Most of the channel locations (52 out of 81 channels) were mapped to one lobar atlas ROI  
527 for all age groups. Some channels were sensitive to more than one lobar ROIs in younger age  
528 groups but were mapped to one lobar ROI in older age groups (CZ, PZ, OZ, F9, F10, T10, FT7,



529 FT8, O1, O2, C5, C6, C1, C2, CP5, and CP6). For example, O1 (left) and O2 (right) were  
530 mapped to the cerebellum, fusiform gyrus, occipital lobe, and parietal lobe for the infant groups  
531 but only to the occipital lobe for 20-24-year-olds. Some channels were sensitive to more than one  
532 lobar ROIs only in older age groups (POZ, PO9, I1, and I2). For example, I2 corresponded to  
533 both the right cerebellum and occipital lobe in 12- and 20-24-year-olds but only to the  
534 cerebellum in younger ages. Other channels had similar channel-to-ROI mappings over age (IZ,  
535 P7, P8, PO7, PO8, C3, C4, PO3, and PO4).

536         The Hammers and LPBA40 atlases have smaller structural segmentations than the lobar  
537 atlas. Hence, most of the channel locations were mapped to more than one ROI. At 44 channel  
538 locations, at least one identical ROI from the Hammers and LPBA40 atlas was mapped to the  
539 channel locations across all age groups. There were channels that were sensitive to superior  
540 frontal gyrus (FPZ, AFZ, FZ, FCZ, F2, FC1, and FC2), middle frontal gyrus (FP1, FP2, AF3,  
541 AF4, F5, F3, F4, F6, FC3, and FC4), inferior frontal gyrus (F7, F8, F5, F6, FC5, and FC6),  
542 precentral gyrus (FC5, C1, and C2), postcentral gyrus (C3 and C4), superior parietal gyrus (CPZ,  
543 CP1, and CP2), angular gyrus (CP3 and P4), cuneus (POZ), inferior temporal gyrus (FT9, T9,  
544 and T10), middle temporal gyrus (T7 and T8), and cerebellum (TP9, P9, PO9, I1, TP10, P10,  
545 PO10, and I2) across all age groups. Many channel locations displayed overlapping channel-to-  
546 ROI mapping while between-age differences were also observed. Figure 8 provides examples of  
547 the channel locations sensitive to ROIs delineated using LPBA40. Figure 8A shows a consistent  
548 pattern of channel locations across age for the inferior frontal gyrus, AF7, F5, F7, FC5, AF8, F6,  
549 F8, and FC6; channel location F3 also was sensitive to the inferior frontal gyrus at age 12  
550 months. Figure 8B shows a less consistent pattern of channel locations sensitive to the

551 postcentral gyrus, including CPz, CP1, C1, C3, C4, C5, and C6. However, the pattern of  
552 sensitive channel locations was different for each age.

553

554 A.

3 Months

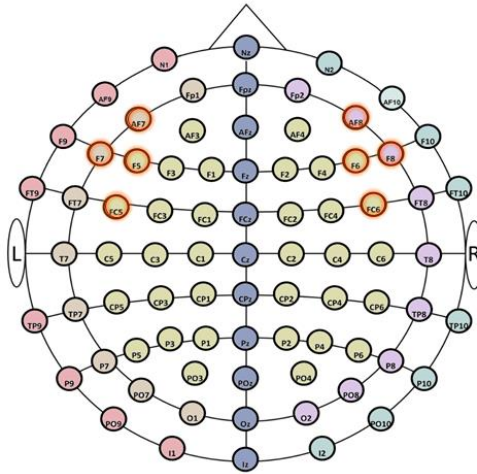

12 Months

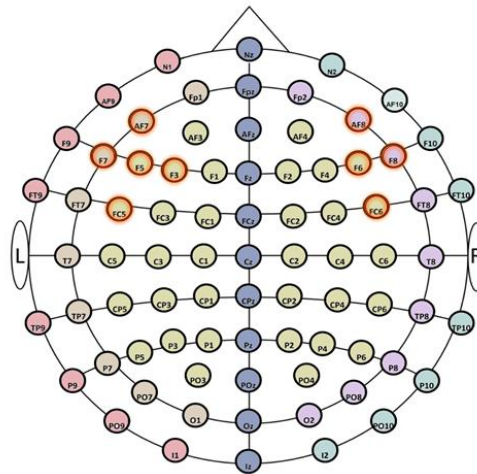

12 Years

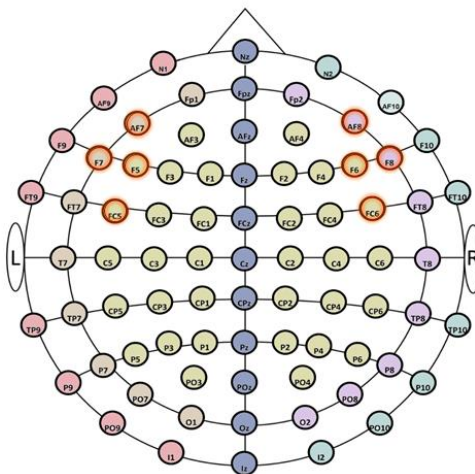

20-24 Years

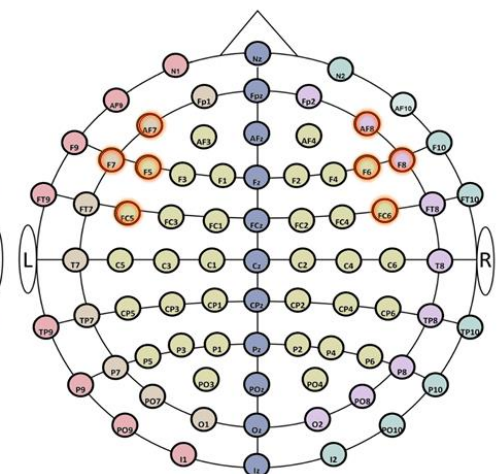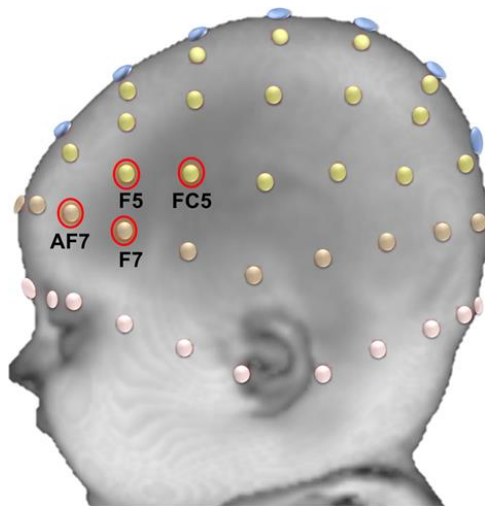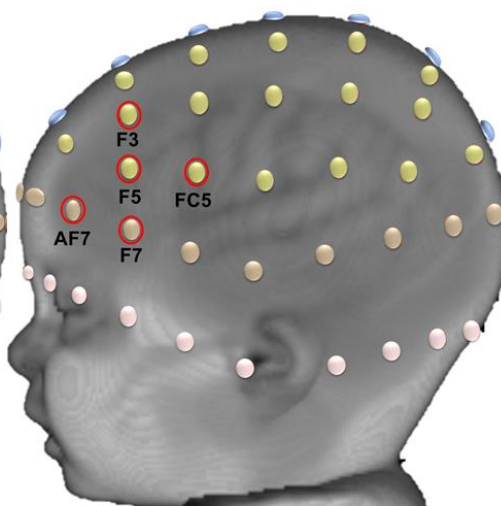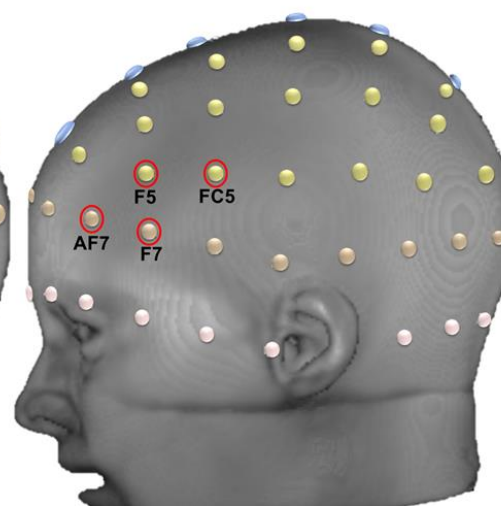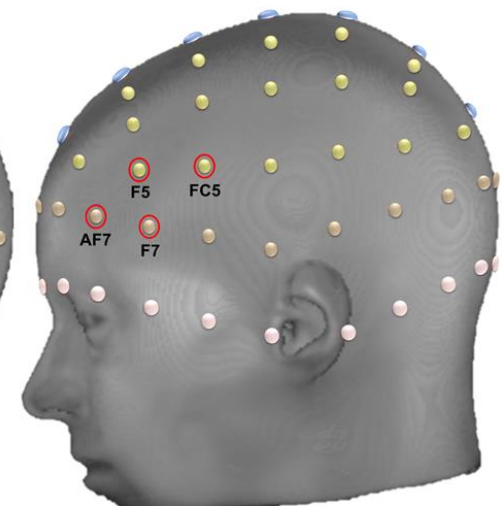

556

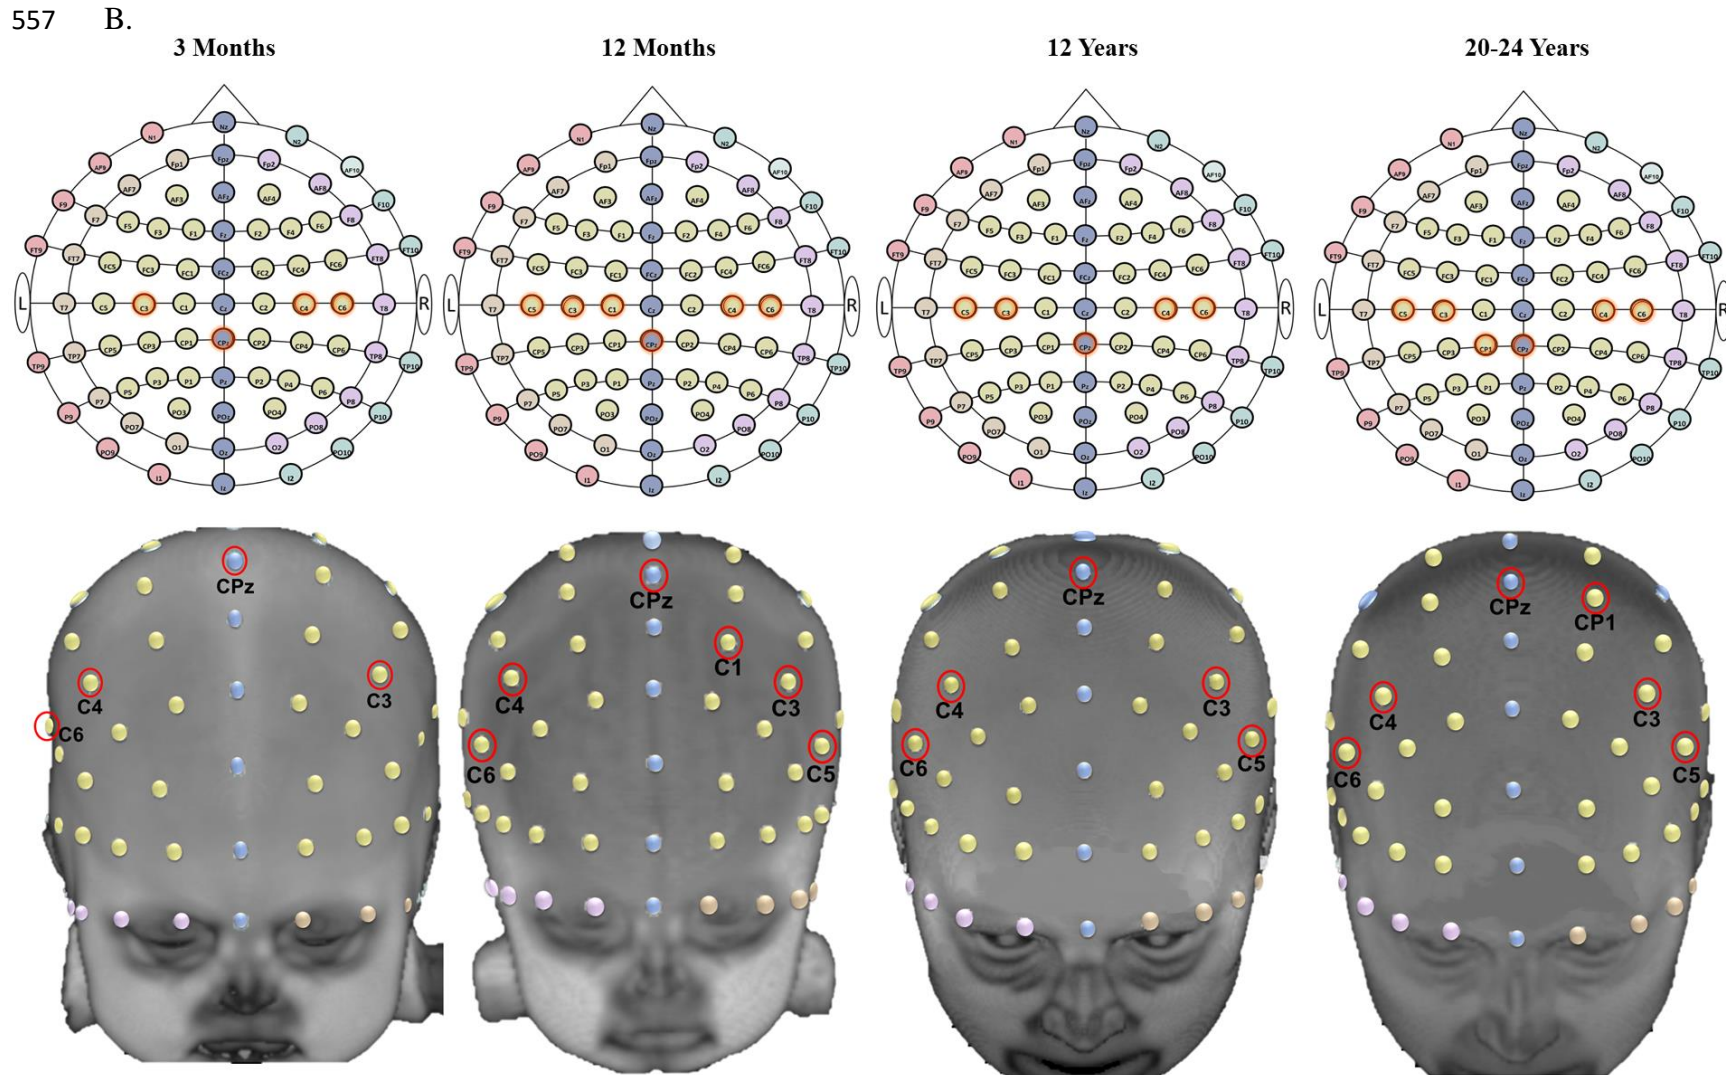



## Discussion

The present study examined age differences in scalp-to-cortex distances and scalp-location-to-ROI correspondence. We extended existing co-registration and photon migration simulation methods to realistic head models from infants ranging from 2 weeks to 24 months, children (4, 12 years) and adults. The scalp-to-cortex distances increased from infancy to childhood and to adulthood. There were considerable variations in the distance measures among the infant age groups. The probabilistic mappings between scalp locations and cortical lobes were relatively stable across development. However, the mappings between scalp locations and cortical ROIs in sub-lobar atlas parcellations showed greater age-related variations. We found that individual participant MRIs and average MRI templates from the Neurodevelopmental MRI Database (Richards, in prep; Richards, Sanchez, et al., 2015; Sanchez et al., 2012a, 2012b) were similar in their scalp-to-cortex distances.

### Scalp-to-Cortex Distance

Three methods were used to measure scalp-to-cortex distances. The Scalp Projection method has been commonly adopted in developmental and adult studies to measure the anatomical distance between scalp electrode locations and the cortical surface (Beauchamp et al., 2011; Emberson et al., 2017; Kabdebon et al., 2014; Okamoto et al., 2004; Whiteman et al., 2017). We also estimated the distance between the scalp location and the maximum source-detector fluence for the “Direct DOT” fluence distribution. The distances for these two measures were very similar. This is likely due to the monotonic and somewhat non-linear photon decay distribution across the head which is maximal near the surface of the cortex (Fu & Richards, under review). The S-D Channel DOT fluence distances were greater than distances estimated from the other methods across scalp locations for all age groups. The S-D Channel DOT fluence

represents the flow of photons from the source to the detector (Fu & Richards, under review) and was deeper than the cortical surface (Scalp Projection) or the photon flow from the optode source injection point (Direct DOT).

All three estimation methods indicated that scalp-to-cortex distances averaged across the scalp locations increased from infancy to childhood and from childhood to adulthood. This finding is consistent with Beauchamp et al. (2011) who measured whole-brain distances from the scalp in newborns through 12-year-olds and other studies that measured scalp-to-cortex distances by electrode positions (3.4- to 16.3-week-olds; Kabdebon et al., 2014; 22- to 51-year-olds; Okamoto et al., 2004; 5- to 11-year-olds; Whiteman et al., 2017). The increase in scalp-to-cortex distances from infancy to adulthood may be attributed to several types of changes in the structure of the head. These include skull thickness (Emberson, Crosswhite, Goodwin, Berger, & Aslin, 2016; Hansman, 1966), increases in CSF volume (Makropoulos et al., 2016), global brain volume and gray matter / white matter growth (Gilmore et al., 2011; Makropoulos et al., 2016; Richards & Conte, 2020; Richards & Xie, 2015), and cortical folding during the first 2 years (Li et al., 2014). Brain structural growth is more gradual during childhood and adolescence and reaches plateau during adulthood (Brain Development Cooperative Group, 2011; Raznahan et al., 2011; Richards & Conte, 2020; Richards & Xie, 2015).

There were between-electrode variations in scalp-to-cortex distance, and these variations were heterogeneous among infant groups. The Scalp Projection and S-D Channel DOT distances for all age groups were greatest at the frontal and central electrodes on the bottom row around the face area, followed by electrode locations at the midline along the intra-hemispherical fissure, and the smallest on the electrode locations internal to these edges. Such inter-electrode variations were also found in previous studies (Kabdebon et al., 2014; Okamoto et al., 2004;



Whiteman et al., 2017). Furthermore, we extended prior findings with young infants (Kabdebon et al., 2014) and revealed that there was a prominent decrease in distances from anterior to posterior locations in some infant groups (Scalp Projection distances in 3- to 10.5-month-olds and S-D Channel DOT distances in 2-week- to 10.5-month, 15-month, and 18-month-olds). This anterior-to posterior decrease in distance was less discernible in other age groups including adults (Okamoto et al., 2004). The anterior-posterior gradient coincides with the posterior-to-anterior sequence of cortical maturation (Brain Development Cooperative Group, 2011; Gilmore et al., 2007). The occipital and parietal lobes show faster growth in volume during infancy than the frontal regions (Gilmore et al., 2007). This implies that the posterior regions have expanded closer to the scalp surface earlier than anterior regions. In contrast, there is more significant age-related decline in occipital and parietal lobes than the frontal lobe from childhood to young adulthood (Brain Development Cooperative Group, 2011). The region-specific heterogeneous patterns of brain development that are observable from infancy (e.g. Gilmore et al., 2007; Gilmore et al., 2011; Li, Lin, Gilmore, & Shen, 2015; Makropoulos et al., 2016; Remer et al., 2017) may contribute to the lack of systematic age-related increase in scalp-to-cortex distances among infant groups. Together, the Scalp Projection and DOT fluence measures of scalp-to-cortex distances are sensitive to the complex age- and region-dependent cortical growth.

Gauging scalp-to-cortex distance is a foundational step for optimizing DOT sensitivity to the target cortical regions. Fu and Richards (under review) showed that the infants groups displayed different DOT sensitivity profiles compared to the adults with source-detector channels placed at the same distances. A common practice is to use longer separations for adults than infants (Gervain et al., 2011; Pinti et al., 2020). Increasing the separation distance allows the fluence distribution to extend deeper into the head tissues and thus sample cortical regions at

greater depth (Fu & Richards, under review; Strangman, Li, & Zhang, 2013). However, the increased depth sensitivity is at the expense of decreased signal strength (Wang, Ayaz, & Izzetoglu, 2019). The current findings on age differences in scalp-to-cortex distance can be used with age-specific DOT sensitivity profiles (Fu & Richards, under review) to find optimal source-detector separation distances that allow for comparable depth sensitivity for different age groups.

Age-appropriate MRI templates may be used to describe cranio-cerebral correspondence when subjects' own MRIs are unavailable. The present study showed that the age-appropriate templates has comparable S-D Channel DOT distances as the individual head models. Furthermore, the S-D Channel DOT distance estimations were robust across different Monte Carlo simulation methods (MCX, MMC, and tMCimg) for 3-month and 6-month infants' individual MRIs and age-appropriate average templates (Supplemental Information Figure 5, 6, and 7). The developmental differences in scalp-to-cortex distances suggest that adult head models should not be used to make anatomical inferences for infant or child standalone NIRS/fNIRS data. We recommend using age-appropriate average templates or the individual MRIs when the subject's own MRIs are not collected (e.g. Emberson, Cannon, et al., 2016; Emberson et al., 2017; Emberson et al., 2015).

### **Scalp-location-to-ROI Mapping**

This is the first study that provided scalp-location-to-ROI look-up tables computed using multiple methods for a wide range of age groups. We used the Scalp Projection and the S-D Channel DOT fluence to map 10-10 scalp electrode/channel locations with underlying ROIs from a macrostructural atlas (lobar) and two sublobar atlases (Hammers and LPBA40). The Spatial Projection method mapped underlying ROIs based only on the spatial anatomical relations. The S-D Channel DOT method mapped underlying ROIs based on the DOT fluence

sensitivity profile. The S-D Channel-DOT look-up table supported the prior finding that there is consistent correspondence between the majority of scalp locations and macrostructural ROIs for infants (Kabdebon et al., 2014; Lloyd-Fox et al., 2014) and adults (Koessler et al., 2009; Okamoto et al., 2004). For smaller sub-lobar atlas ROIs, some channel locations show consistent correspondence between scalp location and underlying cortical ROI. For example, F5 and F6 were corresponded to bilateral inferior and middle frontal gyrus in all age groups. However, many channel locations show inconstant mappings across age groups. These include posterior midline positions and frontal channels on the bottom row where the scalp-to-cortex distance was larger. For example, channel TP7 was sensitive to both the inferior and middle temporal gyrus in the LPBA40 atlas for age 2 weeks through 12 years whereas it was mapped to only the middle temporal gyrus for 20-24-year-olds. Therefore, it is important to use age-appropriate head models to fully account for the age-dependent head and cortical structural changes when examining cranio-cerebral correspondence.

The age-appropriate S-D Channel DOT look-up procedures can be adopted to localize the ROI(s) that generate the fNIRS activities and design the optode arrangement prior to data collection. Our findings highlight a recognized issue in fNIRS data interpretation: the channel(s) that show significant activations from the group analysis may not correspond to the same ROI for all participants (Powell, Deen, & Saxe, 2018). This problem is especially concerning for infant and child studies that encompass a wide age range. Our S-D Channel DOT look-up procedures provide an effective solution. The optode locations recorded from an experiment can be co-registered with individual head models from infants closely matched in age and head measurements, if subjects' own MRIs are not available. S-D Channel DOT sensitivity is then estimated to infer the subject-specific ROI(s) that have generated the fNIRS signals. The

methodological details were also presented elsewhere (Bulgarelli et al., 2019; Bulgarelli et al., 2020; Perdue et al., 2019).

Our method and tables may also be used to design optode placement on NIRS holders that maximize channel sensitivity to hemodynamic changes of underlying ROIs. The tables we provide for the 10-10 or 10-5 recording system can be used as lookup tables for either manual construction of optode locations or used with automatic methods. We additionally provided age-appropriate S-D Channel DOT look-up table that quantify the sensitivity of channel pairings from the fOLD toolbox (Zimeo Morais et al., 2018) to lobar and sub-lobar ROIs (Supplemental Information Table 2). The table provides the specificity (%) of the channel to the ROI out of the total S-D Channel DOT sensitivity to all ROIs in the atlas. Researchers can thus design their holders to include channels that are sensitive to the user-specified ROIs with a specificity threshold (Zimeo Morais et al., 2018). Supplemental Information Figure 2D presents an example of optode placement that includes channels sensitive to the left inferior frontal gyrus with specificity greater than 1% for 6-month infants.

## **Implications**

The age-specific scalp-to-cortex distances and channel-to-ROI look-up tables can be used to guide channel placements and data analysis. Cross-sectional and longitudinal fNIRS studies need to ensure that age-group comparisons are made on data from sensors that sample the same ROI with comparable sensitivity to the cortex across ages. For example, for a study aiming to compare activations in the inferior frontal gyrus among 3-month, 12-month, and 12-year-old participants, Supplementary Information Table 1 and Figure 8A indicate that sensor placement that covers channel locations AF7, F7, F5, F3, FC5, AF8, F8, F6, and FC6 could be used for all age groups. We also know that the average distances to the cortex from the frontal electrode

locations differed by age (3 months: 8mm; 12 months: 6mm; 12 years: 10mm). Hence, larger source-detector separation distances are expected for older ages. fNIRS studies conventionally use 20mm to 30mm separations for infants (Gervain et al., 2011; Lloyd-Fox, Blasi, & Elwell, 2010) and 30mm to 35mm for children (e.g. Ding, Fu, & Lee, 2014; Perlman, Luna, Hein, & Huppert, 2014). Experimenters should measure the source-detector separation distances after constructing a preliminary holder and adjust accordingly. Experimenters are not advised to compare activations at F3 channel locations between 3-month and 12-month-olds, as F3 may not sample activities from the left inferior frontal gyrus in 3-month-olds.

### **Limitation**

The current study did not compute thickness of segmentation layers or scalp-to-cortex distances by ROI parcellations. This means that we cannot pinpoint the particular tissue layer(s) or cortical region(s) that may contribute to the age-related changes in scalp-to-cortex distance as done in Beauchamp et al. (2011)'s study. Furthermore, existing evidence indicated that DOT sensitivity as a function of source-detector separation distance was different in GM, WM, CSF, and extracerebral tissues (scalp and skull) in infants and adults (Fukui, Ajichi, & Okada, 2003; Mansouri et al., 2010; Strangman et al., 2013; Strangman, Zhang, & Li, 2014). Future analyses that compare distances from the scalp by tissue types and ROIs could more precisely inform age-related differences in the optimal separation distances for sampling cortical signal changes at different brain regions.

### **Conclusions**

The current study examined scalp-to-cortex distances and scalp-to-cortical ROI correspondence in infants, children, and adults. There were differences in the scalp-to-cortex distance in infants, which become magnified in children and adults. We found systematic

differences in scalp-location-to-anatomical ROI correspondence for different ages, both for spatial projection and for DOT fluence sensitivity. Our findings imply that accurate anatomical interpretations of NIRS/fNIRS data are dependent on developmentally sensitive estimations of DOT sensitivity that account for the head and cortical development. The present study demonstrated that age-appropriate realistic head models can be used with spatial scalp projection and photon migration simulations to provide anatomical guidance for standalone DOT data.



## **Acknowledgement**

This research was supported by grants from the National Institute of Child Health and Human Development (NICHD-R01-HD18942, NICHD-R37-HD18942, NIHCD-R03-HD091464) to J.E. Richards.

## **Disclosures**

X. Fu and J.E. Richards have no relevant financial interests in the manuscript and no other potential conflicts of interest to disclose.

### **Code, Data, and Materials Availability**

The age-specific average templates, including T1, DOT sensitivity average template can be accessed from the “Neurodevelopmental MRI Database”. The Database is available online:

<http://jerlab.psych.sc.edu/NeurodevelopmentalMRIDatabase/> for information and

<https://www.nitrc.org/projects/neurodevdata/> for access. Details on the online access are

provided in Richards, Sanchez, Phillips-Meek, and Xie (2015). The codes that support the

findings of this study are available from the corresponding author, XF, upon request.

## References

- 1 Avants, B. B., Tustison, N. J., Song, G., Cook, P. A., Klein, A., & Gee, J. C. (2011). A reproducible evaluation of ANTs similarity metric performance in brain image registration. *Neuroimage*, *54*(3), 2033-2044. doi:<https://doi.org/10.1016/j.neuroimage.2010.09.025>
- 2 Beauchamp, M. S., Beurlot, M. R., Fava, E., Nath, A. R., Parikh, N. A., Saad, Z. S., . . . Oghalai, J. S. (2011). The Developmental Trajectory of Brain-Scalp Distance from Birth through Childhood: Implications for Functional Neuroimaging. *PLOS ONE*, *6*(9), e24981. doi:10.1371/journal.pone.0024981
- 3 Boas, D. A., Culver, J. P., Stott, J. J., & Dunn, A. K. (2002). Three dimensional Monte Carlo code for photon migration through complex heterogeneous media including the adult human head. *Opt Express*, *10*, 159-170.
- 4 Brain Development Cooperative Group. (2011). Total and Regional Brain Volumes in a Population-Based Normative Sample from 4 to 18 Years: The NIH MRI Study of Normal Brain Development. *Cerebral Cortex*, *22*(1), 1-12. doi:10.1093/cercor/bhr018
- 5 Brigadoi, S., Aljabar, P., Kuklisova-Murgasova, M., Arridge, S. R., & Cooper, R. J. (2014). A 4D neonatal head model for diffuse optical imaging of pre-term to term infants. *Neuroimage*, *100*, 385-394. doi:10.1016/j.neuroimage.2014.06.028
- 6 Brigadoi, S., & Cooper, R. J. (2015). How short is short? Optimum source-detector distance for short-separation channels in functional near-infrared spectroscopy. *Neurophotonics*, *2*(2), 025005. doi:10.1117/1.NPh.2.2.025005
- 7 Brigadoi, S., Salvagnin, D., Fischetti, M., & Cooper, R. (2018). Array Designer: automated optimized array design for functional near-infrared spectroscopy. *Neurophotonics*, *5*(3), 035010. Retrieved from <https://doi.org/10.1117/1.NPh.5.3.035010>
- 8 Bulgarelli, C., Blasi, A., de Klerk, C. C. J. M., Richards, J. E., Hamilton, A., & Southgate, V. (2019). Fronto-temporoparietal connectivity and self-awareness in 18-month-olds: A resting state fNIRS study. *Developmental Cognitive Neuroscience*, *38*, 100676. doi:<https://doi.org/10.1016/j.dcn.2019.100676>
- 9 Bulgarelli, C., de Klerk, C. C. J. M., Richards, J. E., Southgate, V., Hamilton, A., & Blasi, A. (2020). The developmental trajectory of fronto-temporoparietal connectivity as a proxy of the default mode network: a longitudinal fNIRS investigation. *Human Brain Mapping*, *41*(10), 2717-2740. doi:10.1002/hbm.24974
- 10 Cooper, R. J., Caffini, M., Dubb, J., Fang, Q., Custo, A., Tsuzuki, D., . . . Boas, D. A. (2012). Validating atlas-guided DOT: a comparison of diffuse optical tomography informed by atlas and subject-specific anatomies. *Neuroimage*, *62*(3), 1999-2006. doi:10.1016/j.neuroimage.2012.05.031
- 11 Culver, J. P., Siegel, A. M., Stott, J. J., & Boas, D. A. (2003). Volumetric diffuse optical tomography of brain activity. *Optics Letters*, *28*(21), 2061-2063. doi:10.1364/ol.28.002061
- 12 Di Martino, A., Yan, C. G., Li, Q., Denio, E., Castellanos, F. X., Alaerts, K., . . . Milham, M. P. (2014). The autism brain imaging data exchange: towards a large-scale evaluation of the intrinsic brain architecture in autism. *Mol Psychiatry*, *19*(6), 659-667. doi:10.1038/mp.2013.78
- 13 Ding, X. P., Fu, G., & Lee, K. (2014). Neural correlates of own- and other-race face recognition in children: A functional near-infrared spectroscopy study. *Neuroimage*, *85*, 335-344. doi:<https://doi.org/10.1016/j.neuroimage.2013.07.051>
- 14 Douaud, G., Smith, S., Jenkinson, M., Behrens, T., Johansen-Berg, H., Vickers, J., . . . James, A. (2007). Anatomically related grey and white matter abnormalities in adolescent-onset schizophrenia. *Brain*, *130*(9), 2375-2386. doi:10.1093/brain/awm184
- 15 Emberson, L. L., Cannon, G., Palmeri, H., Richards, J. E., & Aslin, R. N. (2016). Using fNIRS to Examine Occipital and Temporal Responses to Stimulus Repetition in Young Infants: Evidence of Selective Frontal Cortex Involvement. *Developmental Cognitive Neuroscience*.
- 16 Emberson, L. L., Crosswhite, S. L., Goodwin, J. R., Berger, A. J., & Aslin, R. N. (2016). Isolating the effects of surface vasculature in infant neuroimaging using short-distance optical channels: a

- combination of local and global effects. *Neurophotonics*, 3(3), 031406-031406.  
doi:10.1117/1.NPh.3.3.031406
- 17 Emberson, L. L., Crosswhite, S. L., Richards, J. E., & Aslin, R. N. (2017). The Lateral Occipital Cortex Is Selective for Object Shape, Not Texture/Color, at Six Months. *Journal of Neuroscience*, 37(13), 3698-3703. doi:10.1523/jneurosci.3300-16.2017
  - 18 Emberson, L. L., Richards, J. E., & Aslin, R. N. (2015). Top-down modulation in the infant brain: Learning-induced expectations rapidly affect the sensory cortex at 6 months. *Proceedings of the National Academy of Sciences of the United States of America*, 112(31), 9585–9590. doi:10.1073/pnas.1510343112
  - 19 Fang, Q., & Boas, D. A. (2009a). Monte Carlo simulation of photon migration in 3D turbid media accelerated by graphics processing units. *Opt Express*, 17(22), 20178-20190. doi:10.1364/oe.17.020178
  - 20 Fang, Q., & Boas, D. A. (2009b, 28 June-1 July 2009). *Tetrahedral mesh generation from volumetric binary and grayscale images*. Paper presented at the 2009 IEEE International Symposium on Biomedical Imaging: From Nano to Macro.
  - 21 Fang, Q., & Yan, S. (2019). Graphics processing unit-accelerated mesh-based Monte Carlo photon transport simulations. *Journal of Biomedical Optics*, 24(11), 115002. Retrieved from <https://doi.org/10.1117/1.JBO.24.11.115002>
  - 22 Fekete, T., Rubin, D., Carlson, J. M., & Mujica-Parodi, L. R. (2011). A stand-alone method for anatomical localization of NIRS measurements. *Neuroimage*, 56(4), 2080-2088. doi:<https://doi.org/10.1016/j.neuroimage.2011.03.068>
  - 23 Fillmore, P. T., Phillips-Meek, M. C., & Richards, J. E. (2015). Age-specific MRI brain and head templates for healthy adults from 20 through 89 years of age. *Front Aging Neurosci*, 7, 44. doi:10.3389/fnagi.2015.00044
  - 24 Fillmore, P. T., Richards, J. E., Phillips-Meek, M. C., Cryer, A., & Stevens, M. (2015). Stereotaxic Magnetic Resonance Imaging Brain Atlases for Infants from 3 to 12 Months. *Developmental Neuroscience*, 37(6), 515-532. doi:10.1159/000438749
  - 25 Fu, X., & Richards, J. E. (2020). Age-related Changes in Diffuse Optical Tomography Sensitivity by Source-Detector Separation in Infancy. *bioRxiv*.
  - 26 Fu, X., & Richards, J. E. (under review). Age-related Changes in Diffuse Optical Tomography Sensitivity by Source-Detector Separation in Infancy.
  - 27 Fukui, Y., Ajichi, Y., & Okada, E. (2003). Monte Carlo prediction of near-infrared light propagation in realistic adult and neonatal head models. *Applied Optics*, 42(16), 6. Retrieved from <https://doi.org/10.1364/AO.42.002881>
  - 28 Gervain, J., Mehler, J., Werker, J. F., Nelson, C. A., Csibra, G., Lloyd-Fox, S., . . . Aslin, R. N. (2011). Near-infrared spectroscopy: A report from the McDonnell infant methodology consortium. *Developmental Cognitive Neuroscience*, 1(1), 22-46. doi:<https://doi.org/10.1016/j.dcn.2010.07.004>
  - 29 Gilmore, J. H., Lin, W., Prastawa, M. W., Looney, C. B., Vetsa, Y. S. K., Knickmeyer, R. C., . . . Gerig, G. (2007). Regional Gray Matter Growth, Sexual Dimorphism, and Cerebral Asymmetry in the Neonatal Brain. *The Journal of Neuroscience*, 27(6), 1255. doi:10.1523/JNEUROSCI.3339-06.2007
  - 30 Gilmore, J. H., Schmitt, J. E., Knickmeyer, R. C., Smith, J. K., Lin, W., Styner, M., . . . Neale, M. C. (2010). Genetic and environmental contributions to neonatal brain structure: A twin study. *Human Brain Mapping*, 31(8), 1174-1182. doi:10.1002/hbm.20926
  - 31 Gilmore, J. H., Shi, F., Woolson, S. L., Knickmeyer, R. C., Short, S. J., Lin, W., . . . Shen, D. (2011). Longitudinal Development of Cortical and Subcortical Gray Matter from Birth to 2 Years. *Cerebral Cortex*, 22(11), 2478-2485. doi:10.1093/cercor/bhr327
  - 32 Gousias, I. S., Rueckert, D., Heckemann, R. A., Dyet, L. E., Boardman, J. P., Edwards, A. D., & Hammers, A. (2008). Automatic segmentation of brain MRIs of 2-year-olds into 83 regions of interest. *Neuroimage*, 40(2), 672-684. doi:10.1016/j.neuroimage.2007.11.034
  - 33 Haeussinger, F. B., Heinzl, S., Hahn, T., Schecklmann, M., Ehli, A.-C., & Fallgatter, A. J. (2011). Simulation of Near-Infrared Light Absorption Considering Individual Head and Prefrontal Cortex

- Anatomy: Implications for Optical Neuroimaging. *PLOS ONE*, 6(10), e26377.  
doi:10.1371/journal.pone.0026377
- 34 Hansman, C. F. (1966). Growth of Interorbital Distance and Skull Thickness as Observed in Roentgenographic Measurements. *Radiology*, 86(1), 87-96. doi:10.1148/86.1.87
  - 35 Hazlett, H. C., Gu, H., Munsell, B. C., Kim, S. H., Styner, M., Wolff, J. J., . . . Statistical, A. (2017). Early brain development in infants at high risk for autism spectrum disorder. *Nature*, 542(7641), 348-351. doi:10.1038/nature21369
  - 36 Heckemann, R. A., Hajnal, J. V., Aljabar, P., Rueckert, D., & Hammers, A. (2006). Automatic anatomical brain MRI segmentation combining label propagation and decision fusion. *Neuroimage*, 33(1), 115-126. doi:<https://doi.org/10.1016/j.neuroimage.2006.05.061>
  - 37 Howell, B. R., Styner, M. A., Gao, W., Yap, P.-T., Wang, L., Baluyot, K., . . . Ellison, J. T. (2019). The UNC/UMN Baby Connectome Project (BCP): An overview of the study design and protocol development. *Neuroimage*, 185, 891-905. doi:<https://doi.org/10.1016/j.neuroimage.2018.03.049>
  - 38 Huppert, T. J., Franceschini, M. A., & Boas, D. A. (2009). Noninvasive Imaging of Cerebral Activation with Diffuse Optical Tomography. In R. D. Frostig (Ed.), *In Vivo Optical Imaging of Brain Function* (2nd ed.). Boca Raton, FL: CRC Press/Taylor & Francis.
  - 39 Jenkinson, M., Pechaud, M., & Smith, S. M. (2005). BET2: MR-based estimation of brain, skull and scalp surfaces. In *Eleventh Annual Meeting of the Organization for Human Brain Mapping*.
  - 40 Jernigan, T. L., Brown, T. T., Hagler, D. J., Akshoomoff, N., Bartsch, H., Newman, E., . . . Dale, A. M. (2016). The Pediatric Imaging, Neurocognition, and Genetics (PING) Data Repository. *Neuroimage*, 124, 1149-1154. doi:<https://doi.org/10.1016/j.neuroimage.2015.04.057>
  - 41 Jurcak, V., Tsuzuki, D., & Dan, I. (2007). 10/20, 10/10, and 10/5 systems revisited: their validity as relative head-surface-based positioning systems. *Neuroimage*, 34(4), 1600-1611. doi:10.1016/j.neuroimage.2006.09.024
  - 42 Kabdebon, C., Leroy, F., Simmonet, H., Perrot, M., Dubois, J., & Dehaene-Lambertz, G. (2014). Anatomical correlations of the international 10–20 sensor placement system in infants. *Neuroimage*, 99, 342-356. doi:<https://doi.org/10.1016/j.neuroimage.2014.05.046>
  - 43 Koessler, L., Maillard, L., Benhadid, A., Vignal, J. P., Felblinger, J., Vespignani, H., & Braun, M. (2009). Automated cortical projection of EEG sensors: Anatomical correlation via the international 10–10 system. *Neuroimage*, 46(1), 64-72. doi:<https://doi.org/10.1016/j.neuroimage.2009.02.006>
  - 44 Li, G., Lin, W., Gilmore, J. H., & Shen, D. (2015). Spatial Patterns, Longitudinal Development, and Hemispheric Asymmetries of Cortical Thickness in Infants from Birth to 2 Years of Age. *The Journal of Neuroscience*, 35(24), 9150. doi:10.1523/JNEUROSCI.4107-14.2015
  - 45 Li, G., Wang, L., Shi, F., Lyall, A. E., Lin, W., Gilmore, J. H., & Shen, D. (2014). Mapping Longitudinal Development of Local Cortical Gyrification in Infants from Birth to 2 Years of Age. *The Journal of Neuroscience*, 34(12), 4228. doi:10.1523/JNEUROSCI.3976-13.2014
  - 46 Lloyd-Fox, S., Blasi, A., & Elwell, C. E. (2010). Illuminating the developing brain: The past, present and future of functional near infrared spectroscopy. *Neuroscience & Biobehavioral Reviews*, 34(3), 269-284. doi:<https://doi.org/10.1016/j.neubiorev.2009.07.008>
  - 47 Lloyd-Fox, S., Richards, J. E., Blasi, A., Murphy, D. G., Elwell, C. E., & Johnson, M. H. (2014). Coregistering functional near-infrared spectroscopy with underlying cortical areas in infants. *Neurophotonics*, 1(2), 025006. doi:10.1117/1.NPh.1.2.025006
  - 48 Lloyd-Fox, S., Wu, R., Richards, J. E., Elwell, C. E., & Johnson, M. H. (2013). Cortical Activation to Action Perception is Associated with Action Production Abilities in Young Infants. *Cerebral Cortex*, 25(2), 289-297. doi:10.1093/cercor/bht207
  - 49 Makropoulos, A., Aljabar, P., Wright, R., Hüning, B., Merchant, N., Arichi, T., . . . Rueckert, D. (2016). Regional growth and atlasing of the developing human brain. *Neuroimage*, 125, 456-478. doi:<https://doi.org/10.1016/j.neuroimage.2015.10.047>
  - 50 Mansouri, C., L'Huillier, J.-p., Kashou, N. H., & Humeau, A. (2010). Depth sensitivity analysis of functional near-infrared spectroscopy measurement using three-dimensional Monte Carlo modeling-



- based magnetic resonance imaging. *Lasers in Medical Science*, 25(3), 431-438.  
doi:<http://dx.doi.org/10.1007/s10103-010-0754-4>
- 51 Matsui, M., Homae, F., Tsuzuki, D., Watanabe, H., Katagiri, M., Uda, S., . . . Taga, G. (2014). Referential framework for transcranial anatomical correspondence for fNIRS based on manually traced sulci and gyri of an infant brain. *Neuroscience Research*, 80, 55-68.  
doi:<https://doi.org/10.1016/j.neures.2014.01.003>
- 52 Okamoto, M., Dan, H., Sakamoto, K., Takeo, K., Shimizu, K., Kohno, S., . . . Dan, I. (2004). Three-dimensional probabilistic anatomical cranio-cerebral correlation via the international 10–20 system oriented for transcranial functional brain mapping. *Neuroimage*, 21(1), 99-111.  
doi:<https://doi.org/10.1016/j.neuroimage.2003.08.026>
- 53 Okamoto, M., & Dan, I. (2005). Automated cortical projection of head-surface locations for transcranial functional brain mapping. *Neuroimage*, 26(1), 18-28.  
doi:<https://doi.org/10.1016/j.neuroimage.2005.01.018>
- 54 Perdue, K. L., Jensen, S. K. G., Kumar, S., Richards, J. E., Kakon, S. H., Haque, R., . . . Nelson, C. A. (2019). Using functional near-infrared spectroscopy to assess social information processing in poor urban Bangladeshi infants and toddlers. *Developmental Science*, 22(5). doi:10.1111/desc.12839
- 55 Perlman, S. B., Luna, B., Hein, T. C., & Huppert, T. J. (2014). fNIRS evidence of prefrontal regulation of frustration in early childhood. *Neuroimage*, 85, 326-334.  
doi:<https://doi.org/10.1016/j.neuroimage.2013.04.057>
- 56 Pinti, P., Tachtsidis, I., Hamilton, A., Hirsch, J., Aichelburg, C., Gilbert, S., & Burgess, P. W. (2020). The present and future use of functional near-infrared spectroscopy (fNIRS) for cognitive neuroscience. *Annals of the New York Academy of Sciences*, 1464(1), 5-29. doi:10.1111/nyas.13948
- 57 Powell, L. J., Deen, B., & Saxe, R. (2018). Using individual functional channels of interest to study cortical development with fNIRS. *Developmental Science*, 21(4), e12595. doi:10.1111/desc.12595
- 58 Raznahan, A., Shaw, P., Lalonde, F., Stockman, M., Wallace, G. L., Greenstein, D., . . . Giedd, J. N. (2011). How Does Your Cortex Grow? *The Journal of Neuroscience*, 31(19), 7174.  
doi:10.1523/JNEUROSCI.0054-11.2011
- 59 Remer, J., Croteau-Chonka, E., Dean, D. C., D'Arpino, S., Dirks, H., Whiley, D., & Deoni, S. C. L. (2017). Quantifying cortical development in typically developing toddlers and young children, 1–6 years of age. *Neuroimage*, 153, 246-261. doi:<https://doi.org/10.1016/j.neuroimage.2017.04.010>
- 60 Richards, J. E. (2013). Cortical sources of ERP in prosaccade and antisaccade eye movements using realistic source models. *Front Syst Neurosci*, 7, 27. doi:10.3389/fnsys.2013.00027
- 61 Richards, J. E. (in prep). Updating the Neurodevelopmental MRI Database.
- 62 Richards, J. E., Boswell, C., Stevens, M., & Vendemia, J. M. (2015). Evaluating methods for constructing average high-density electrode positions. *Brain Topogr*, 28(1), 70-86.  
doi:10.1007/s10548-014-0400-8
- 63 Richards, J. E., & Conte, S. (2020). Brain development in infants: Structure and experience. In C. Tamis-LeMonda & J. J. Lockman (Eds.), *Cambridge Handbook of Infant Development*. Cambridge: Cambridge.
- 64 Richards, J. E., Sanchez, C. E., Phillips-Meek, M. C., & Xie, W. (2015). A database of age-appropriate average MRI templates. *Neuroimage*, 124(Pt B), 1254-1259.  
doi:10.1016/j.neuroimage.2015.04.055
- 65 Richards, J. E., & Xie, W. (2015). Brains for all the ages: Structural neurodevelopment in infants and children from a life-span perspective. In J. Bensen (Ed.), *Advances in Child Development and Behavior* (Vol. 48).
- 66 Rorden, C. (2012). MRICroGL. Retrieved from McCausland Center: <http://www.mccauslandcenter.sc.edu/mricrogl/>.
- 67 Rorden, C., & Brett, M. (2000). Stereotaxic Display of Brain Lesions. *Behavioural Neurology*, 12, 421719. doi:10.1155/2000/421719

- 68 Sanchez, C. E., Richards, J. E., & Almlí, C. R. (2012a). Age-Specific MRI Templates for Pediatric Neuroimaging. *Developmental Neuropsychology*, 37(5), 379-399. doi:10.1080/87565641.2012.688900
- 69 Sanchez, C. E., Richards, J. E., & Almlí, C. R. (2012b). Neurodevelopmental MRI brain templates for children from 2 weeks to 4 years of age (vol 54, pg 77, 2012). *Developmental Psychobiology*, 54(4), 474-474. doi:10.1002/dev.21018
- 70 Shattuck, D. W., Mirza, M., Adisetiyo, V., Hojatkashani, C., Salamon, G., Narr, K. L., . . . Toga, A. W. (2008). Construction of a 3D probabilistic atlas of human cortical structures. *Neuroimage*, 39(3), 1064-1080. doi:<https://doi.org/10.1016/j.neuroimage.2007.09.031>
- 71 Smith, S. M., Jenkinson, M., Woolrich, M. W., Beckmann, C. F., Behrens, T. E. J., Johansen-Berg, H., . . . Matthews, P. M. (2004). Advances in functional and structural MR image analysis and implementation as FSL. *Neuroimage*, 23, S208-S219. doi:<https://doi.org/10.1016/j.neuroimage.2004.07.051>
- 72 Strangman, G., Li, Z., & Zhang, Q. (2013). Depth Sensitivity and Source-Detector Separations for Near Infrared Spectroscopy Based on the Colin27 Brain Template. *PLOS ONE*, 8(8), e66319. doi:10.1371/journal.pone.0066319
- 73 Strangman, G., Zhang, Q., & Li, Z. (2014). Scalp and skull influence on near infrared photon propagation in the Colin27 brain template. *Neuroimage*, 85, 136-149. doi:<https://doi.org/10.1016/j.neuroimage.2013.04.090>
- 74 Tran, A. P., Yan, S., & Fang, Q. (2020). Improving model-based functional near-infrared spectroscopy analysis using mesh-based anatomical and light-transport models. *Neurophotonics*, 7(1), 015008. Retrieved from <https://doi.org/10.1117/1.NPh.7.1.015008>
- 75 Tsuzuki, D., Cai, D.-s., Dan, H., Kyutoku, Y., Fujita, A., Watanabe, E., & Dan, I. (2012). Stable and convenient spatial registration of stand-alone NIRS data through anchor-based probabilistic registration. *Neuroscience Research*, 72(2), 163-171. doi:<https://doi.org/10.1016/j.neures.2011.10.008>
- 76 Tsuzuki, D., & Dan, I. (2014). Spatial registration for functional near-infrared spectroscopy: From channel position on the scalp to cortical location in individual and group analyses. *Neuroimage*, 85, 92-103. doi:<https://doi.org/10.1016/j.neuroimage.2013.07.025>
- 77 Tsuzuki, D., Homae, F., Taga, G., Watanabe, H., Matsui, M., & Dan, I. (2017). Macroanatomical Landmarks Featuring Junctions of Major Sulci and Fissures and Scalp Landmarks Based on the International 10–10 System for Analyzing Lateral Cortical Development of Infants. *Frontiers in Neuroscience*, 11(394). doi:10.3389/fnins.2017.00394
- 78 Tustison, N. J., Avants, B. B., Cook, P. A., Zheng, Y., Egan, A., Yushkevich, P. A., & Gee, J. C. (2010). N4ITK: Improved N3 Bias Correction. *IEEE Transactions on Medical Imaging*, 29(6), 1310-1320. doi:10.1109/tmi.2010.2046908
- 79 Wang, Ayaz, H., & Izzetoglu, M. (2019). Investigation of the source-detector separation in near infrared spectroscopy for healthy and clinical applications. *Journal of Biophotonics*, 12(11), e201900175. doi:10.1002/jbio.201900175
- 80 Whiteman, A., Santosa, H., Chen, D., Perlman, S., & Huppert, T. (2017). Investigation of the sensitivity of functional near-infrared spectroscopy brain imaging to anatomical variations in 5- to 11-year-old children. *Neurophotonics*, 5(1), 011009. Retrieved from <https://doi.org/10.1117/1.NPh.5.1.011009>
- 81 Yan, S., Tran, A. P., & Fang, Q. (2019). Dual-grid mesh-based Monte Carlo algorithm for efficient photon transport simulations in complex three-dimensional media. *Journal of Biomedical Optics*, 24(2), 020503. Retrieved from <https://doi.org/10.1117/1.JBO.24.2.020503>
- 82 Zimeo Morais, G. A., Balardin, J. B., & Sato, J. R. (2018). fNIRS Optodes' Location Decider (fOLD): a toolbox for probe arrangement guided by brain regions-of-interest. *Scientific Reports*, 8(1), 3341. doi:10.1038/s41598-018-21716-z
